# Supplementary material
Source: bioRxiv or medRxiv preprint supplement (https://www.biorxiv.org/highwire/filestream/30369/field_highwire_adjunct_files/2/105742-3.pdf)

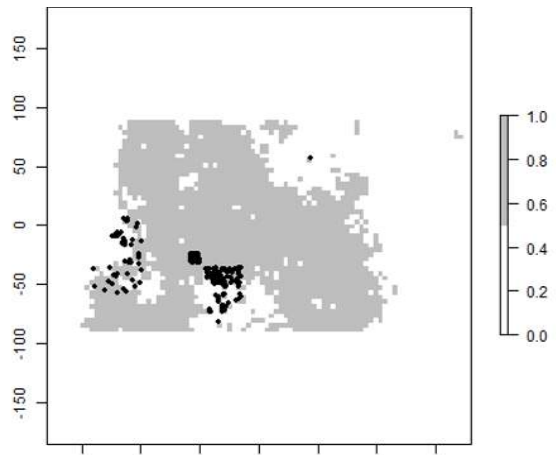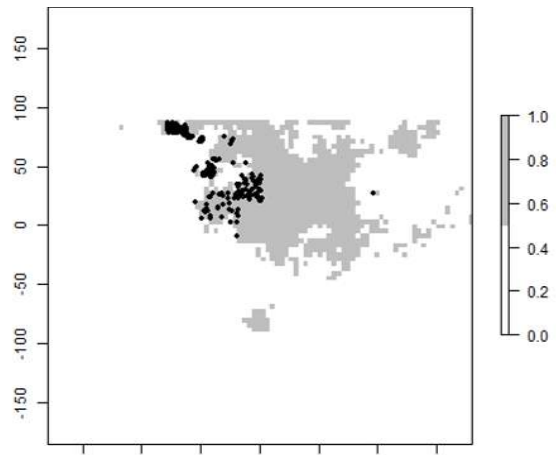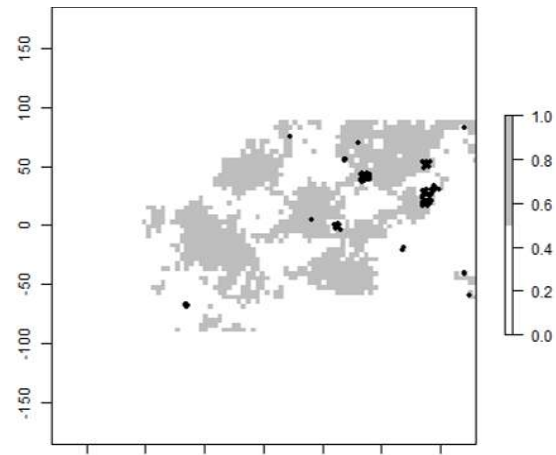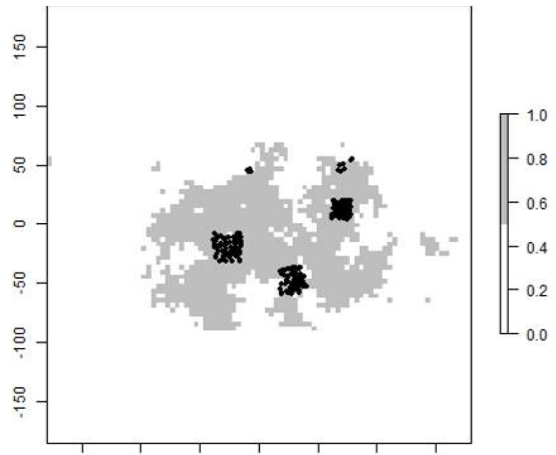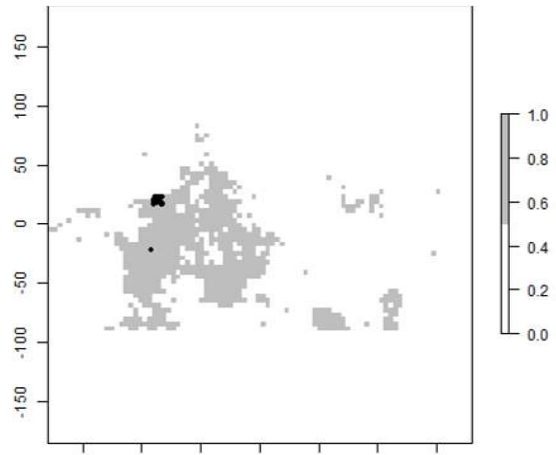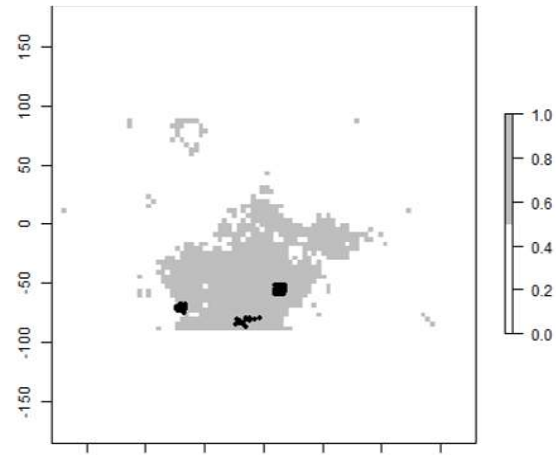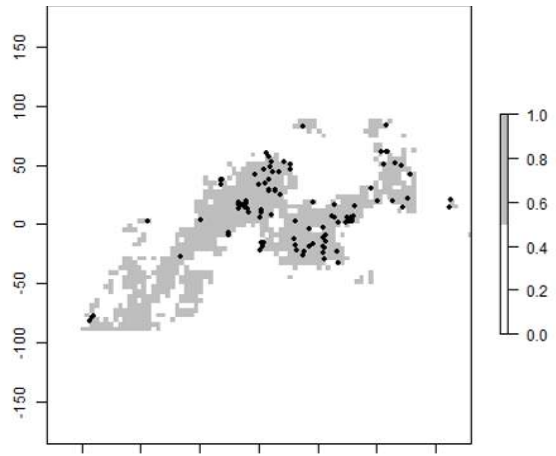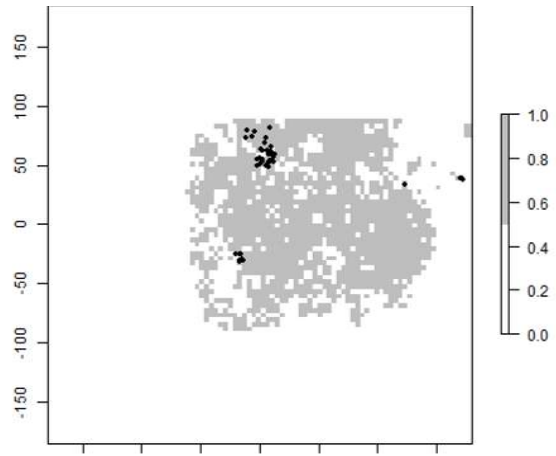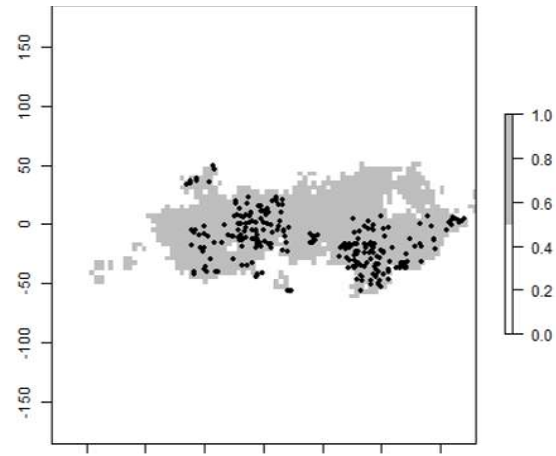

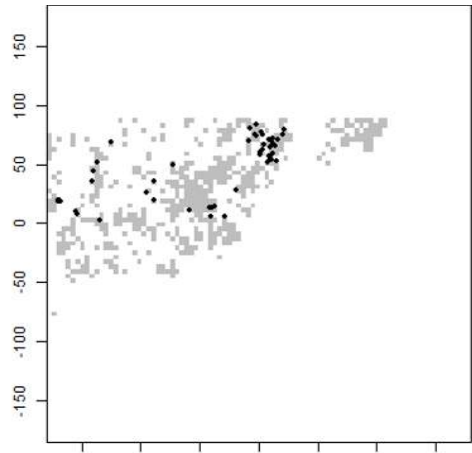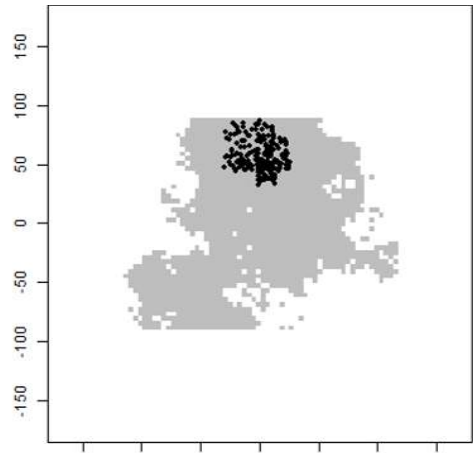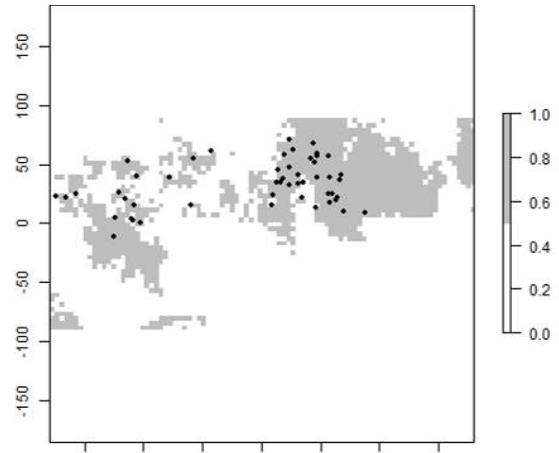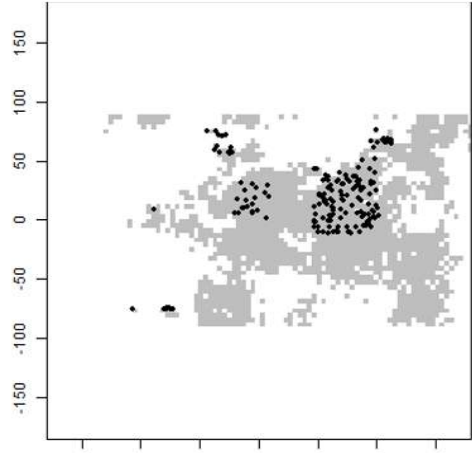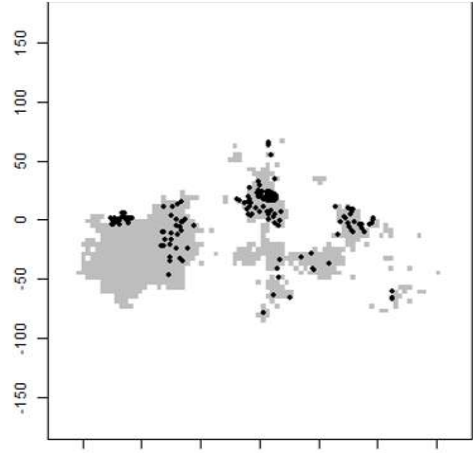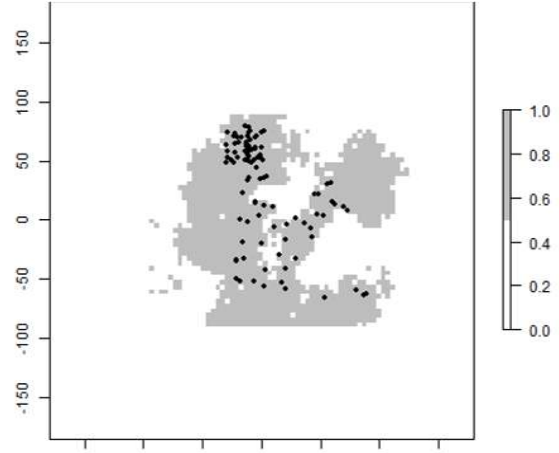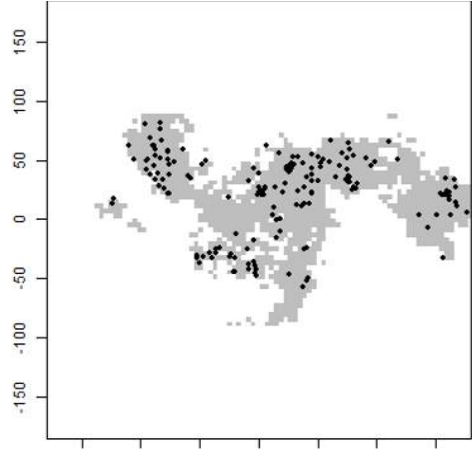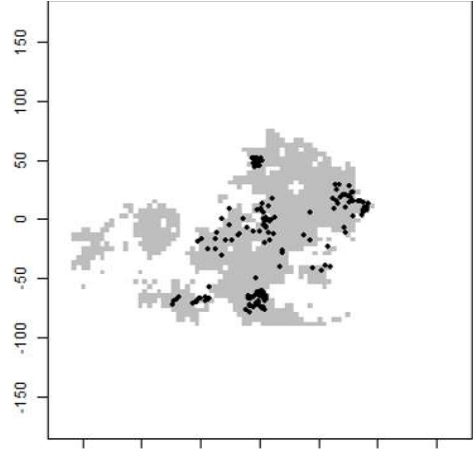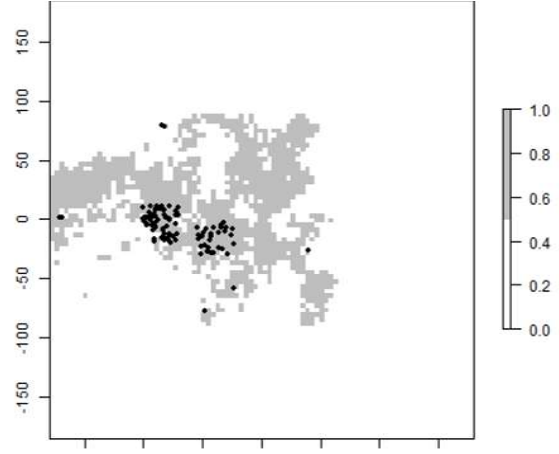

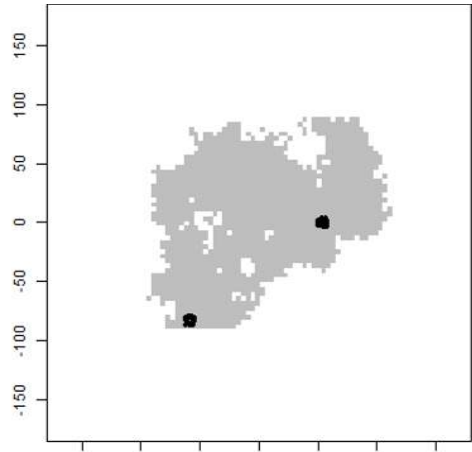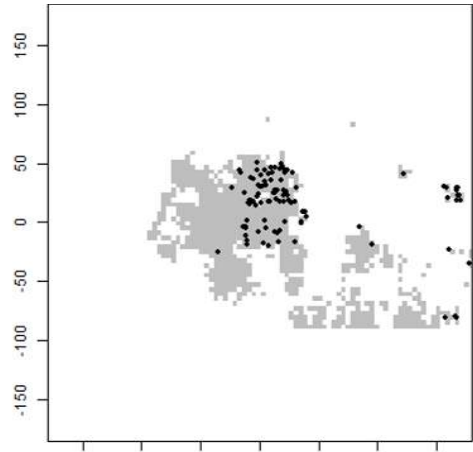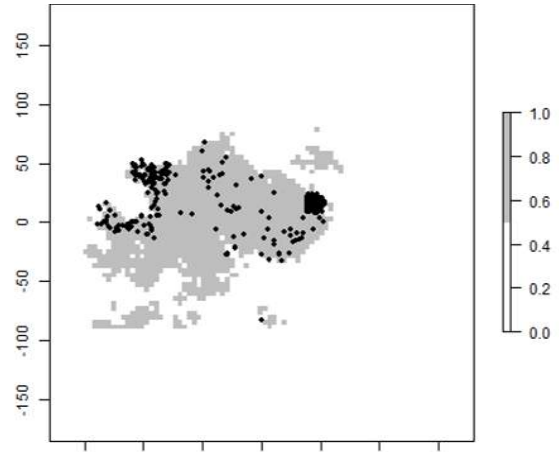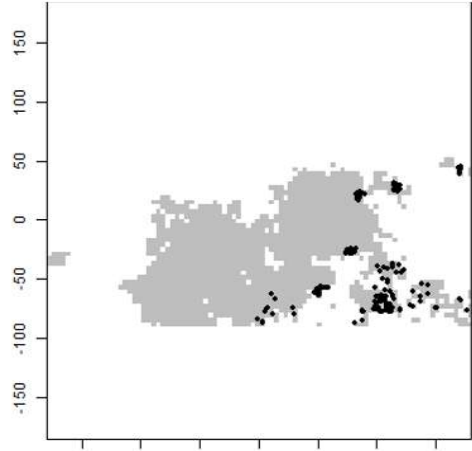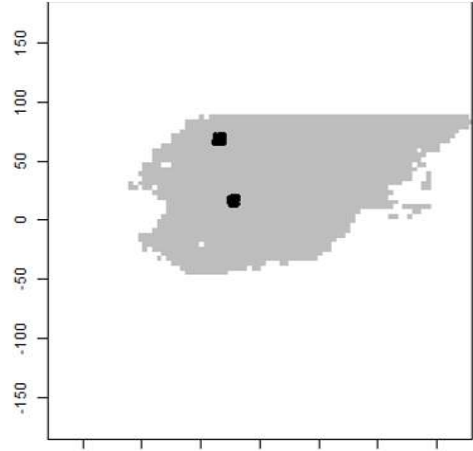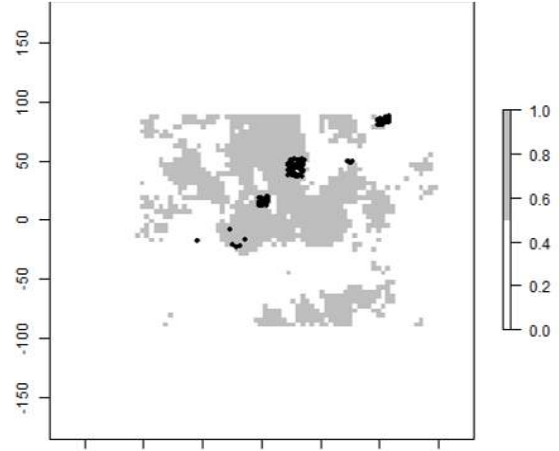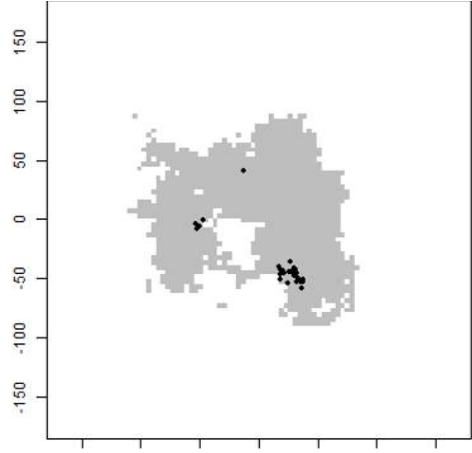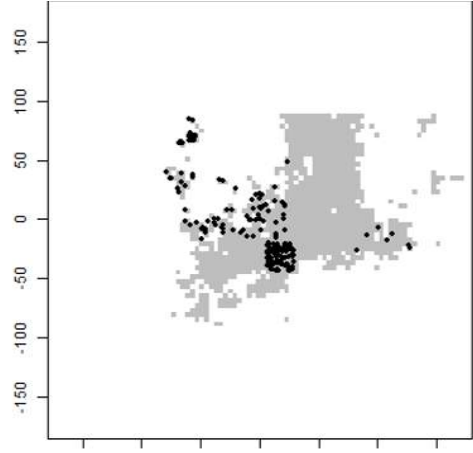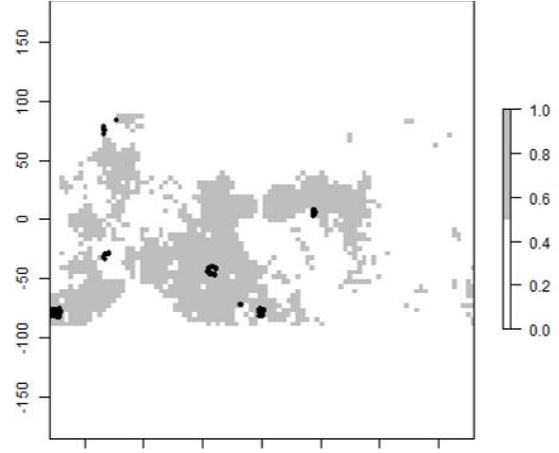

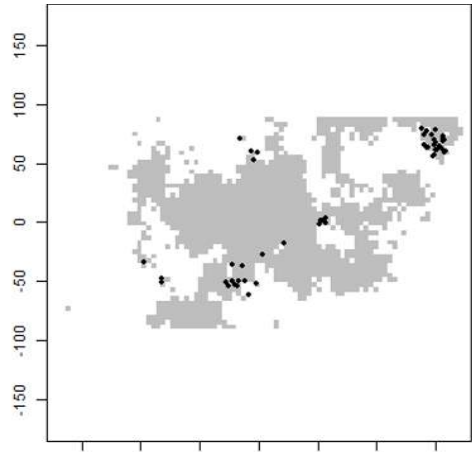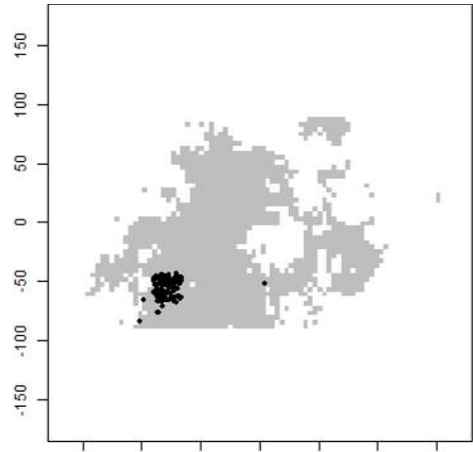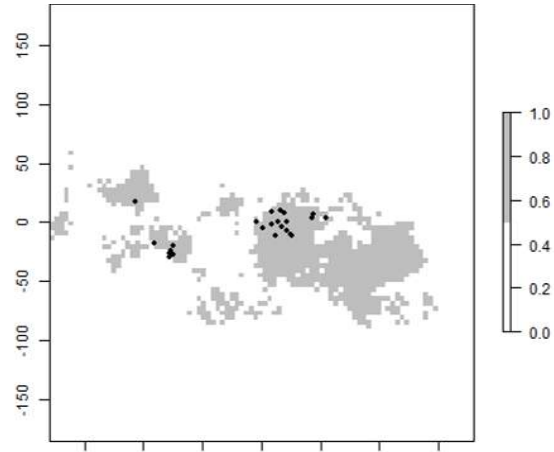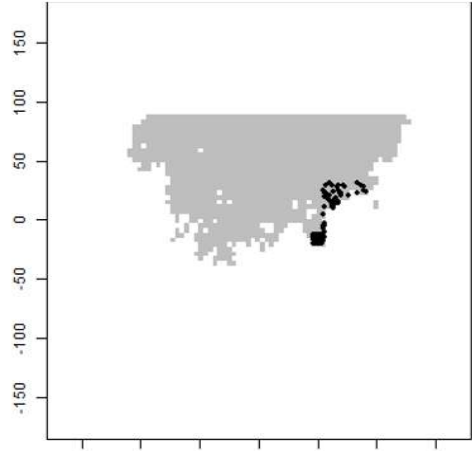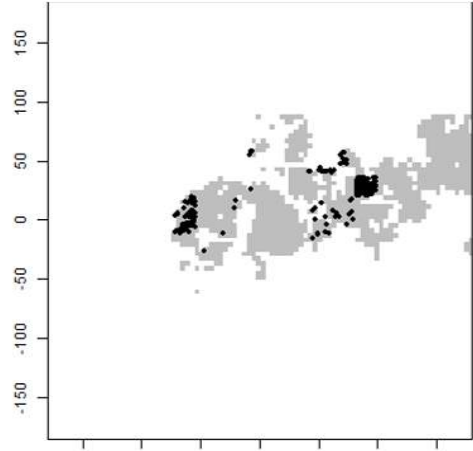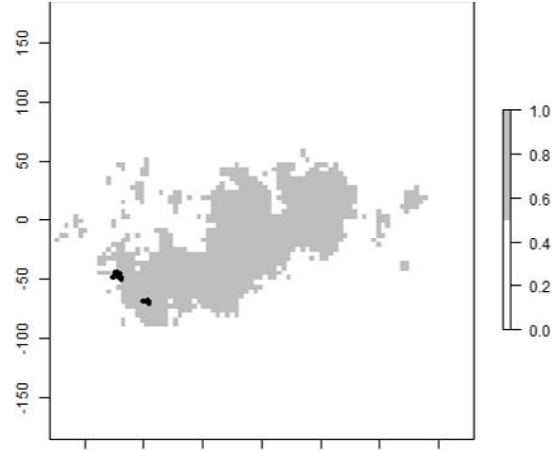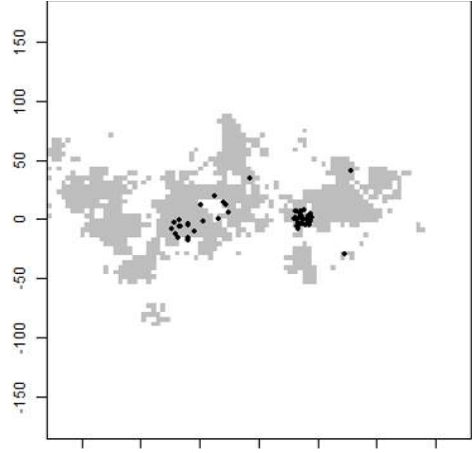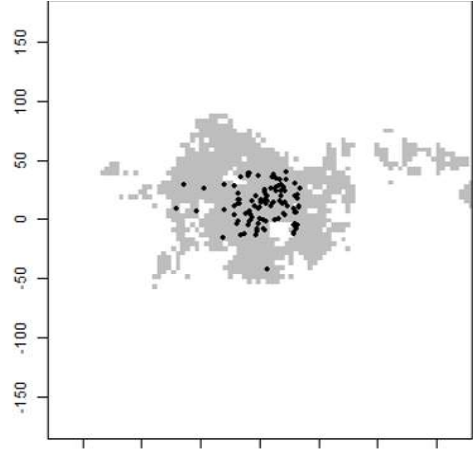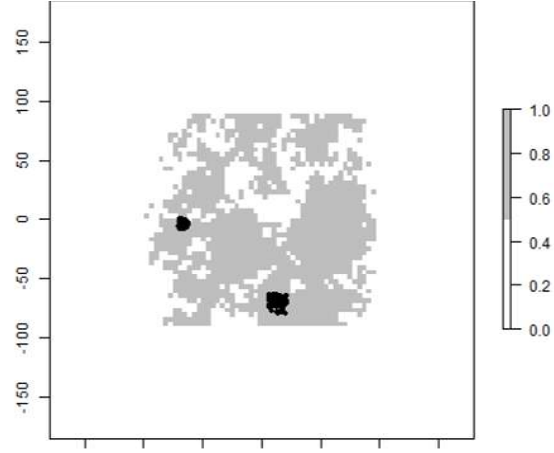

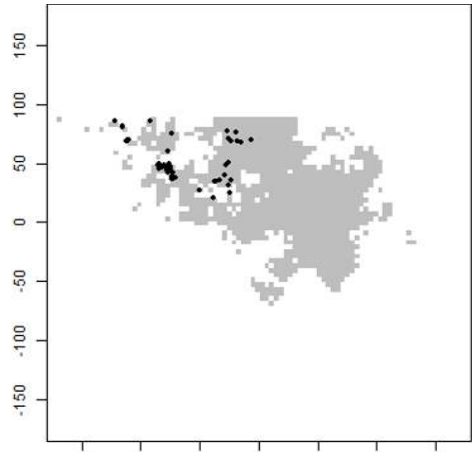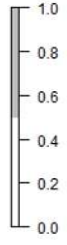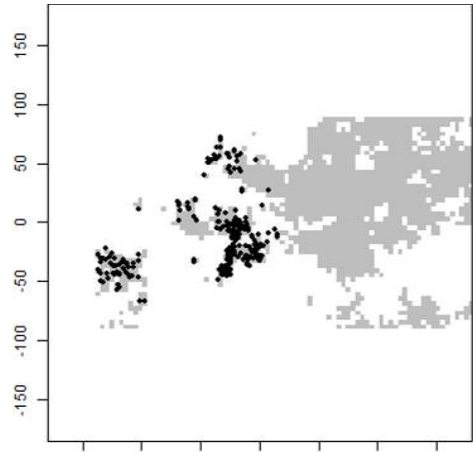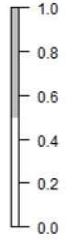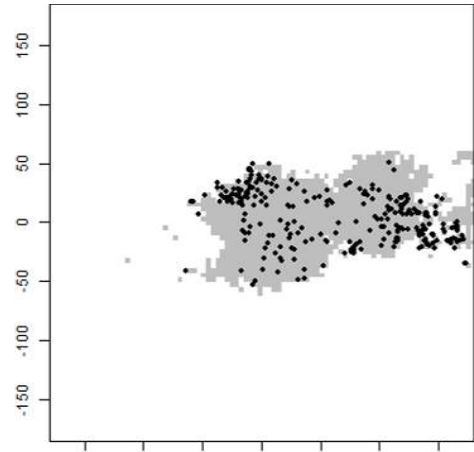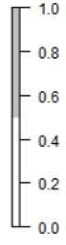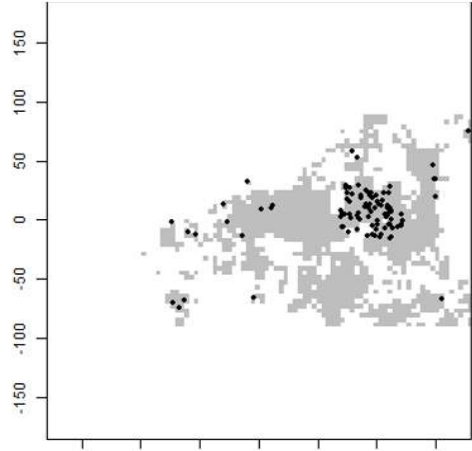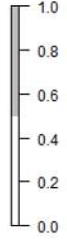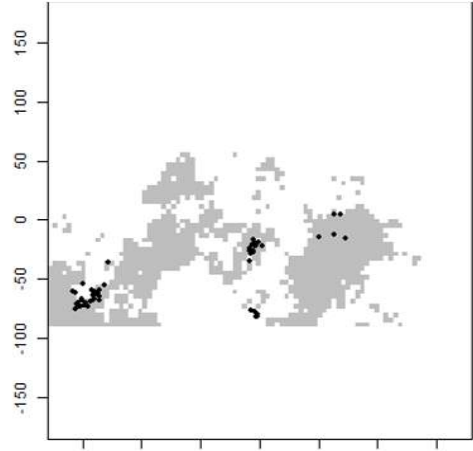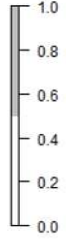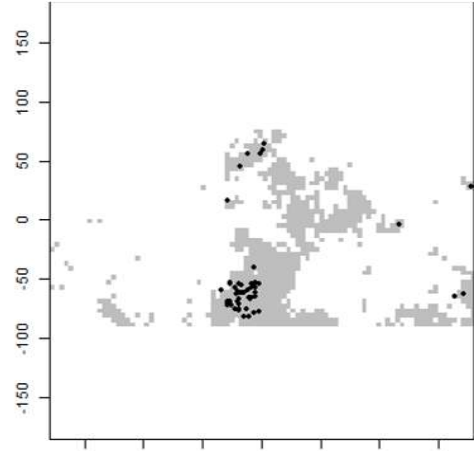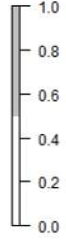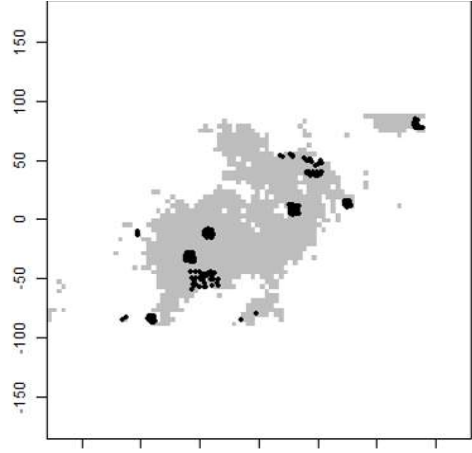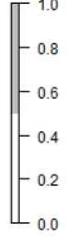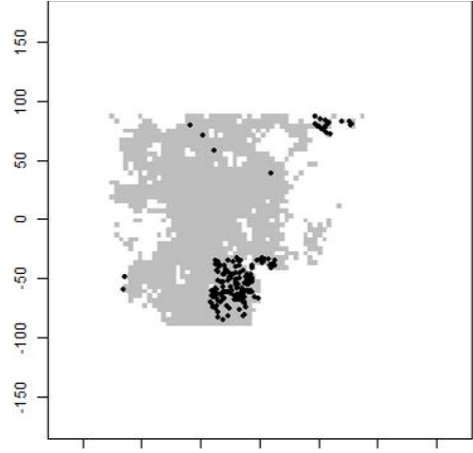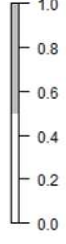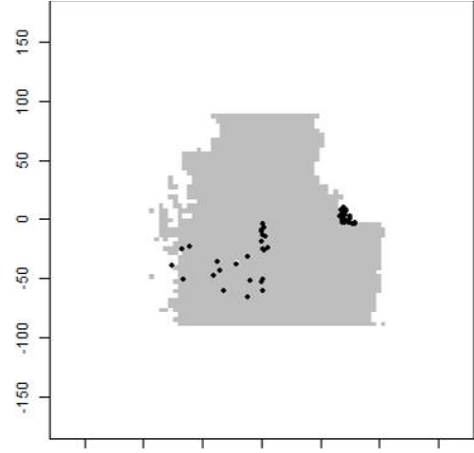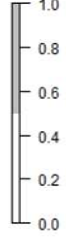

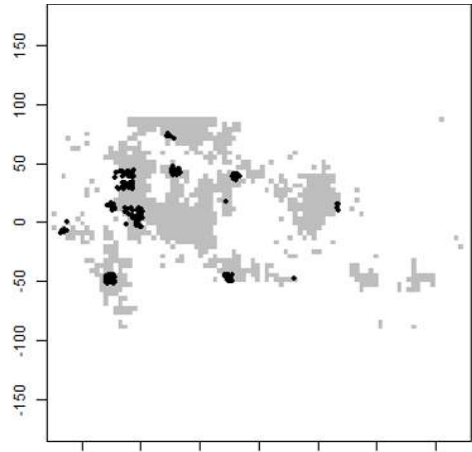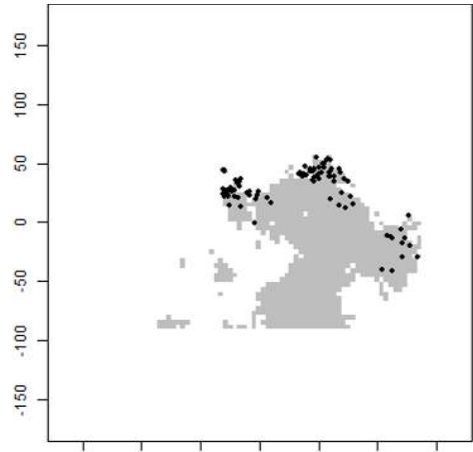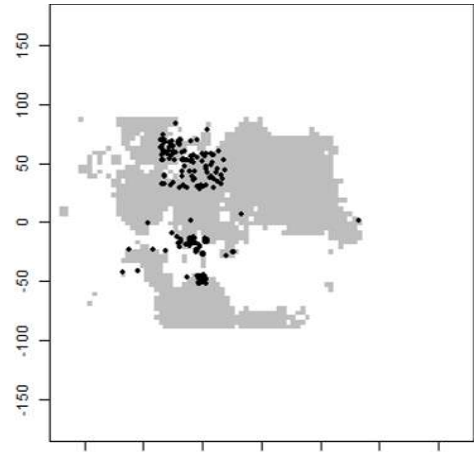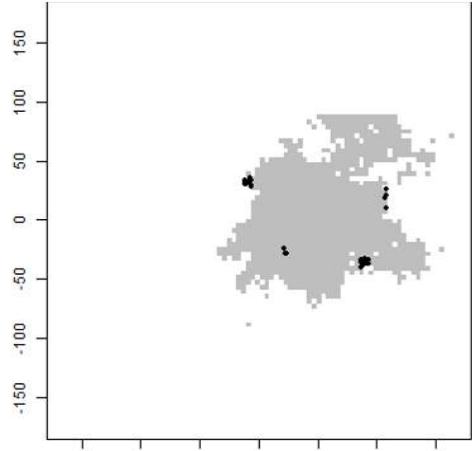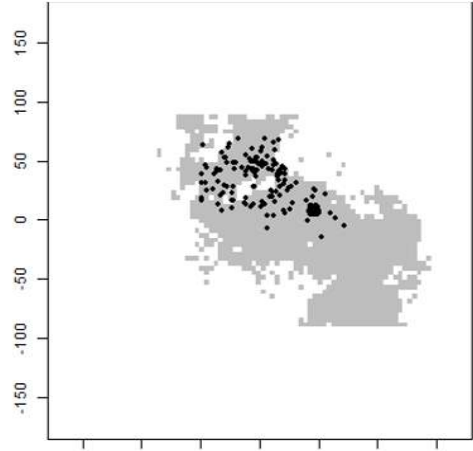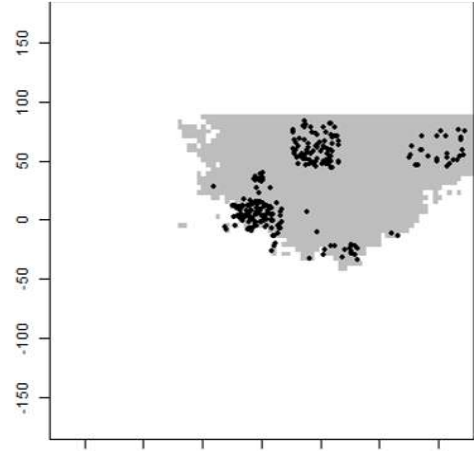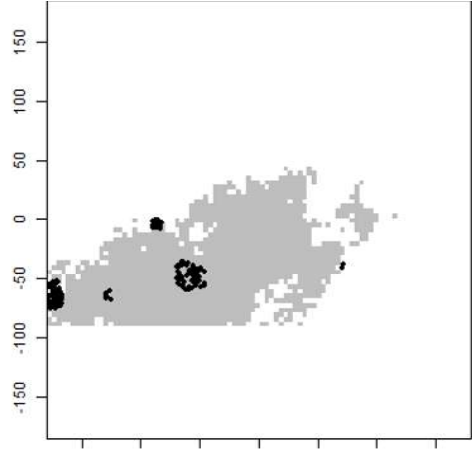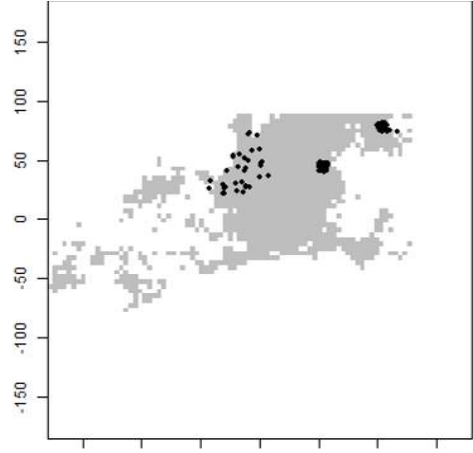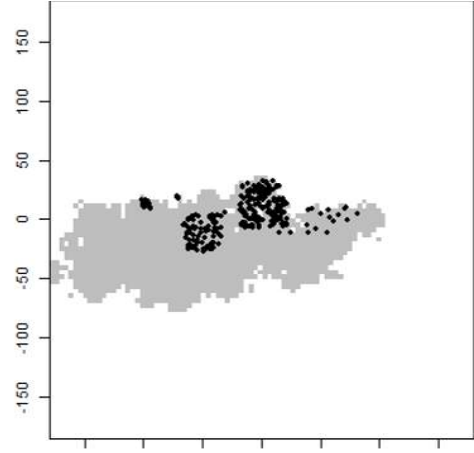

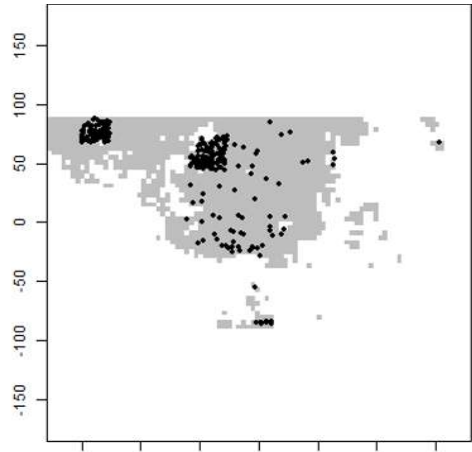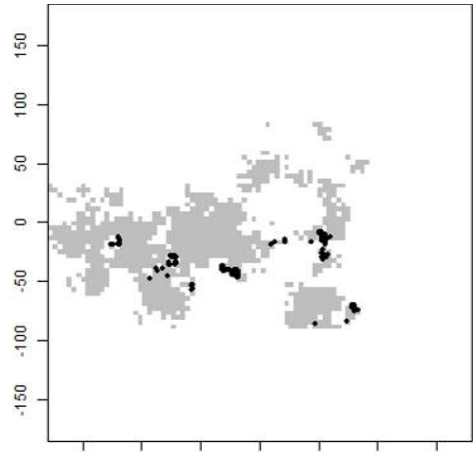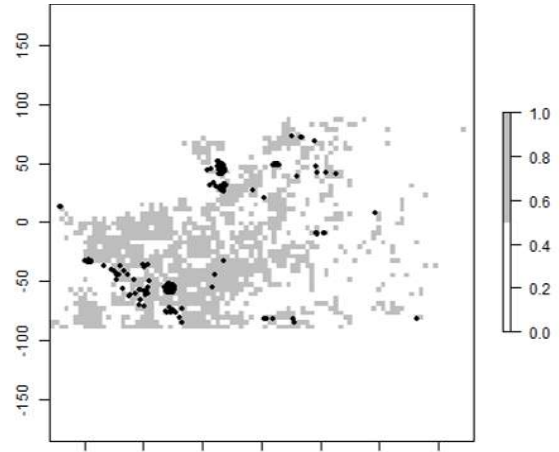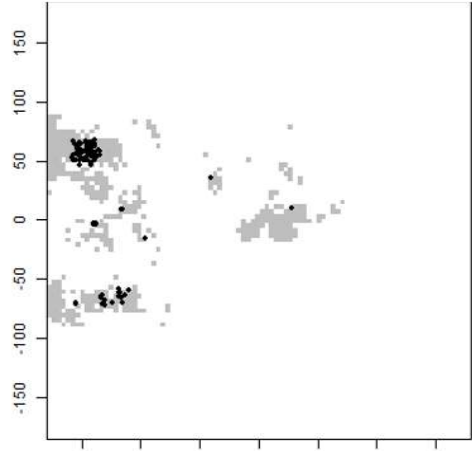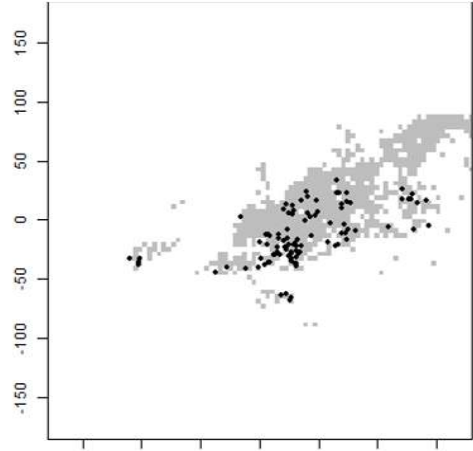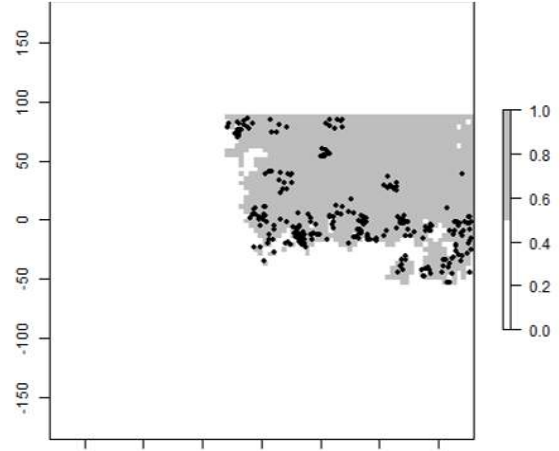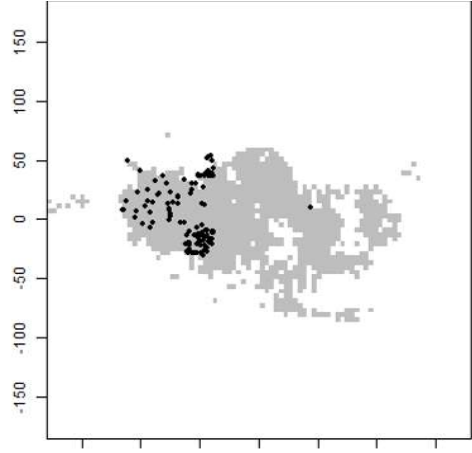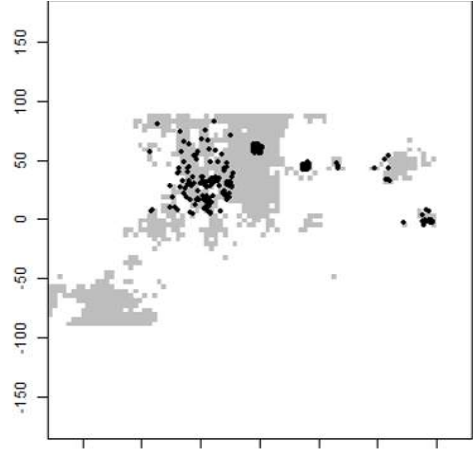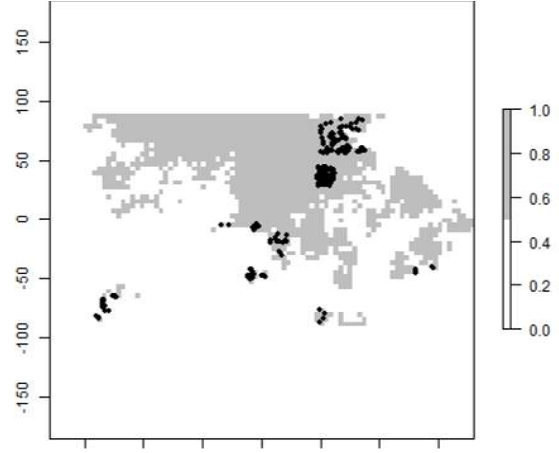

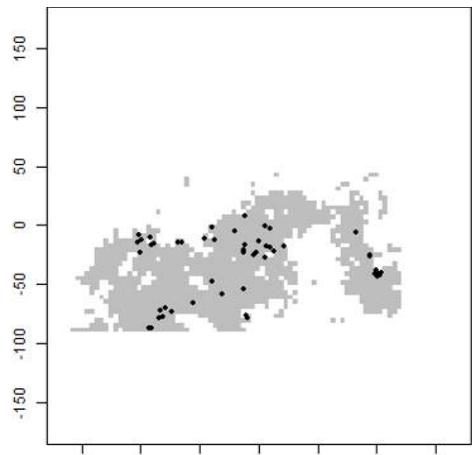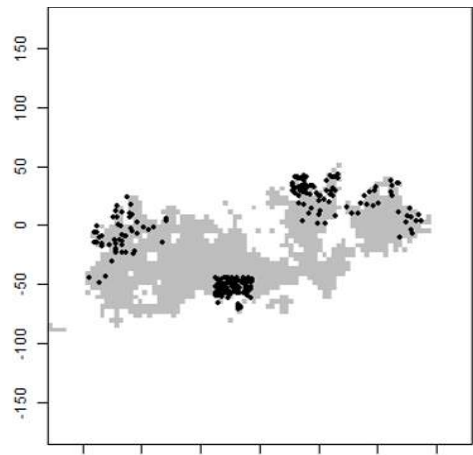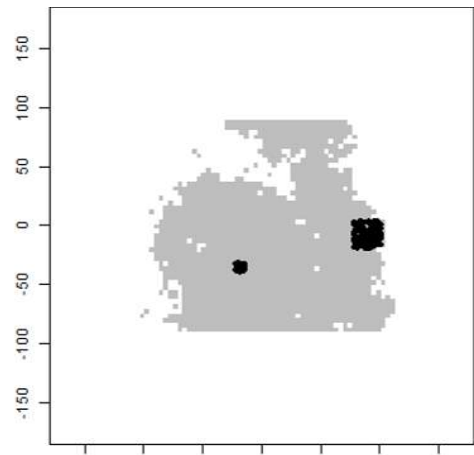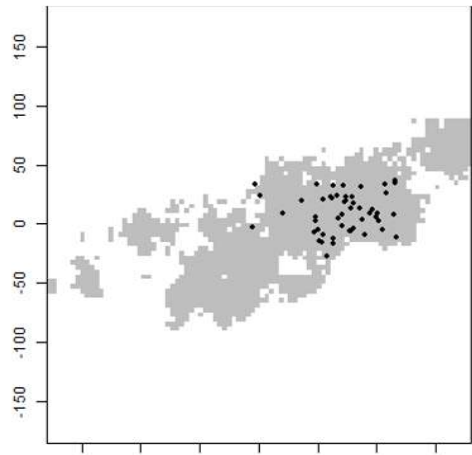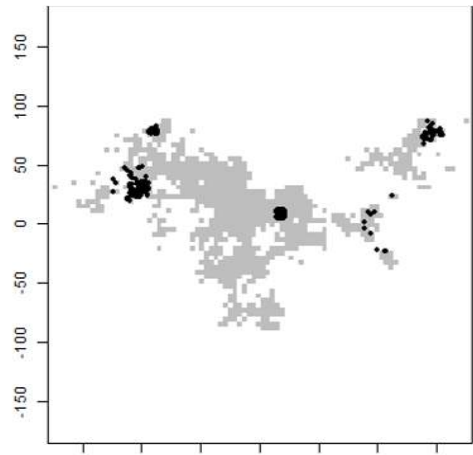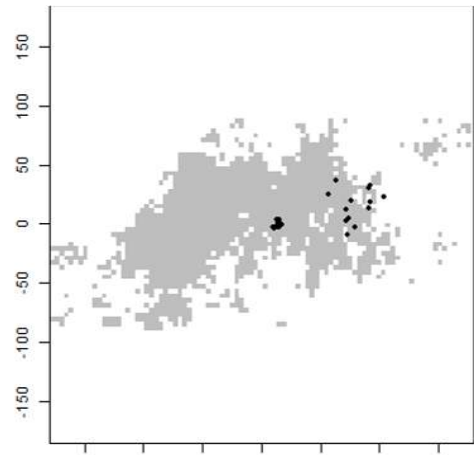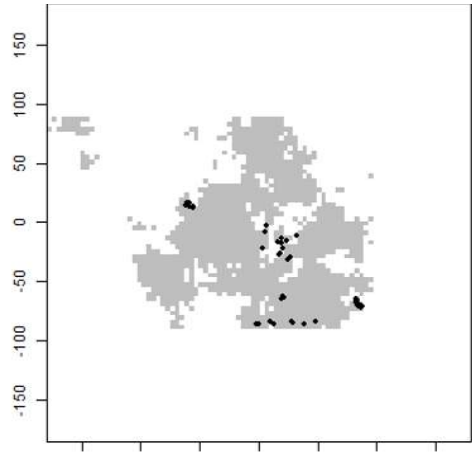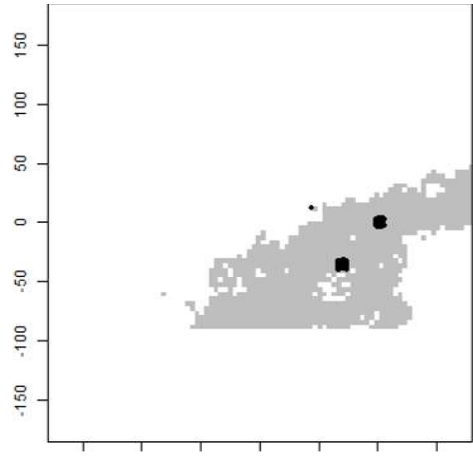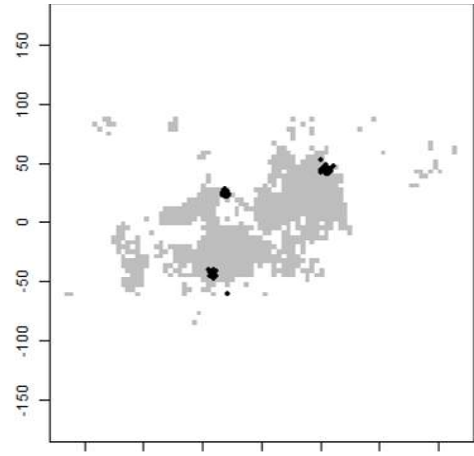



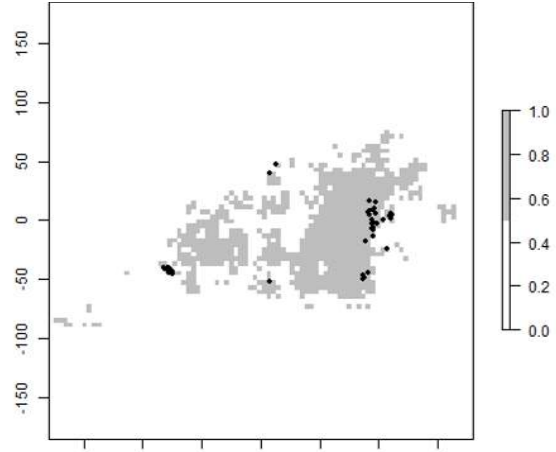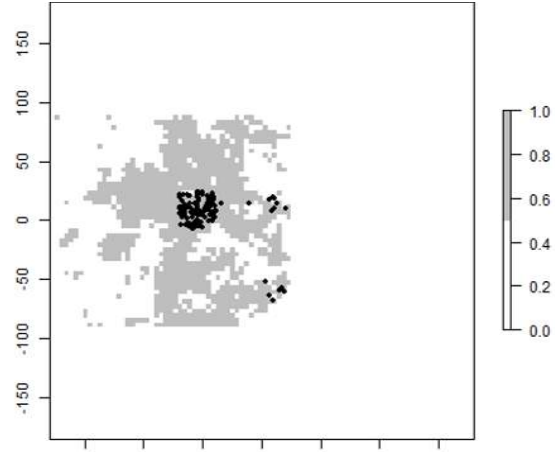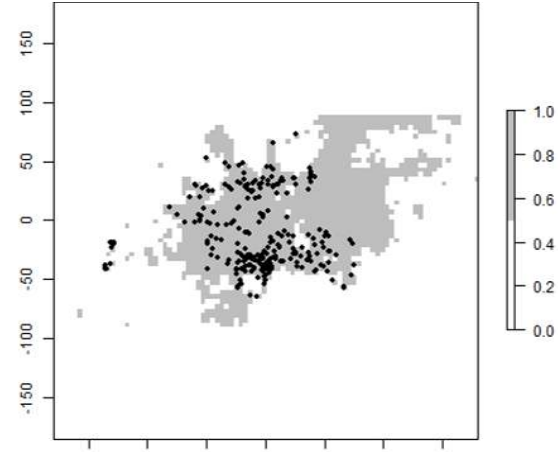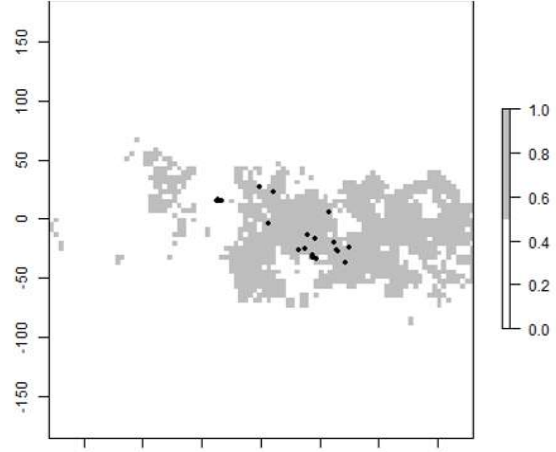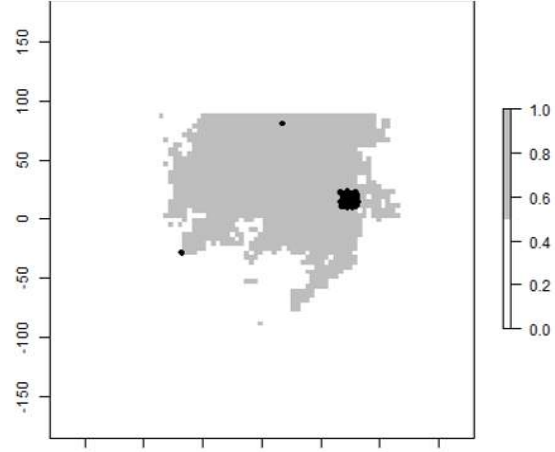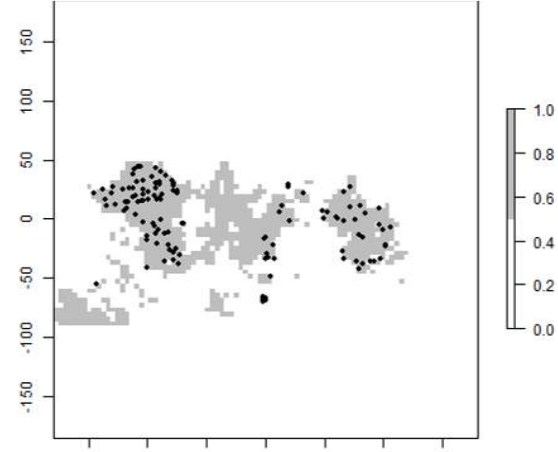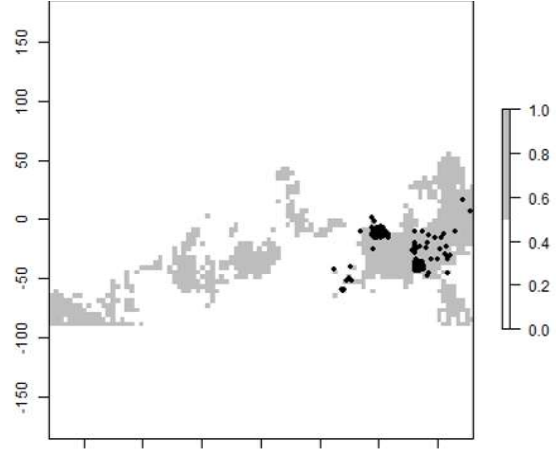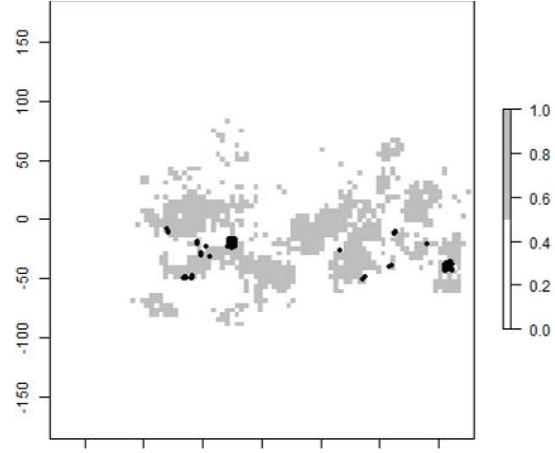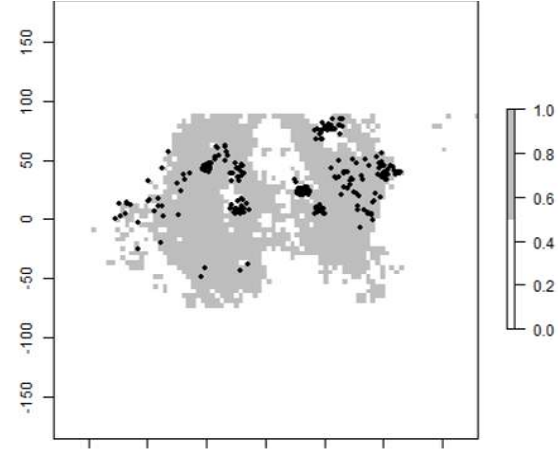

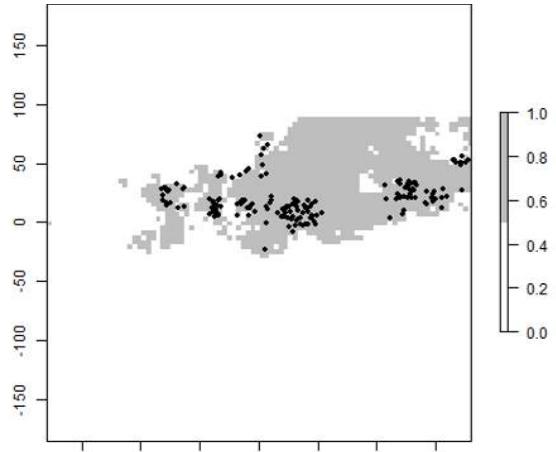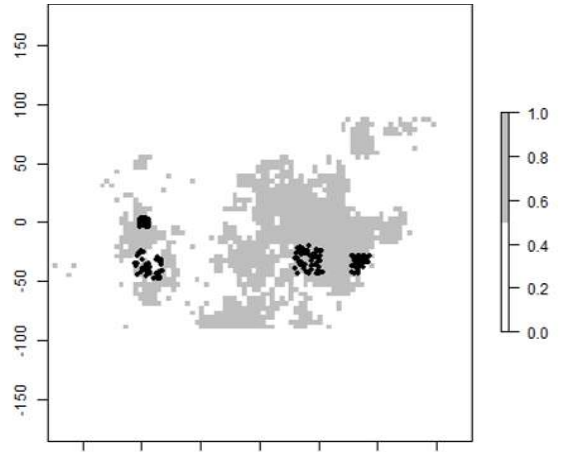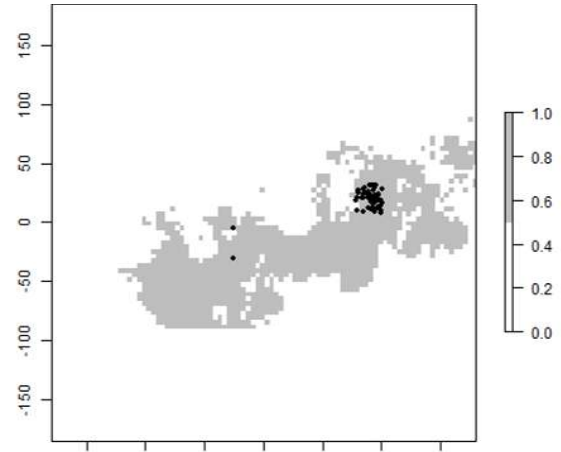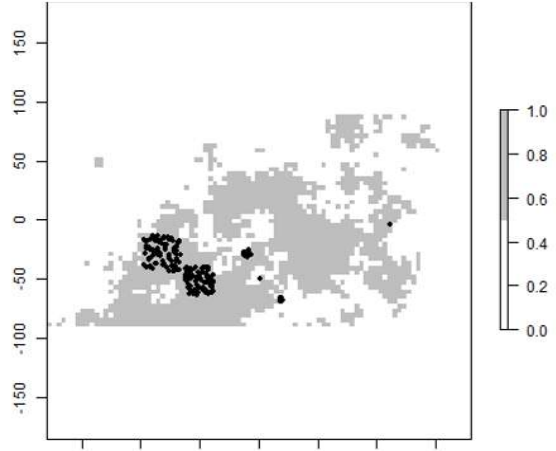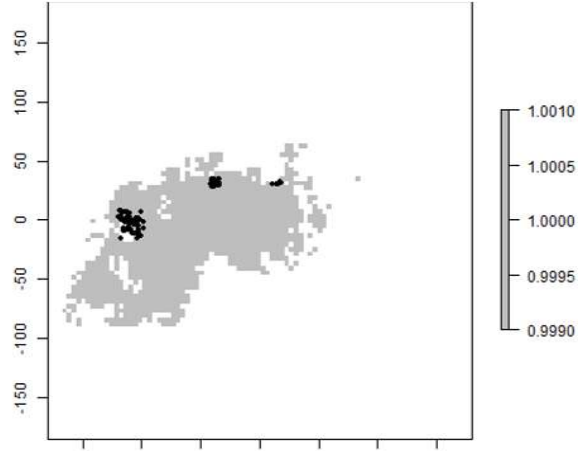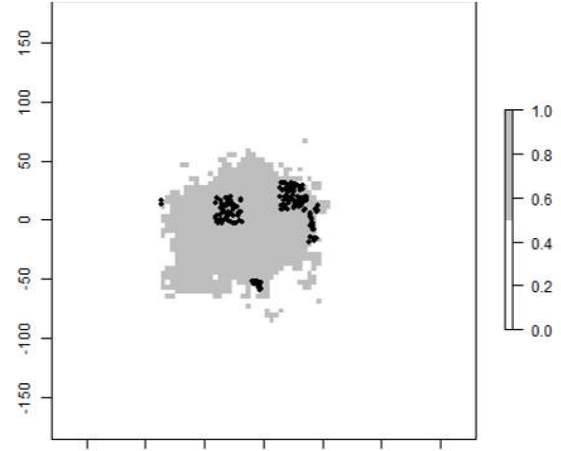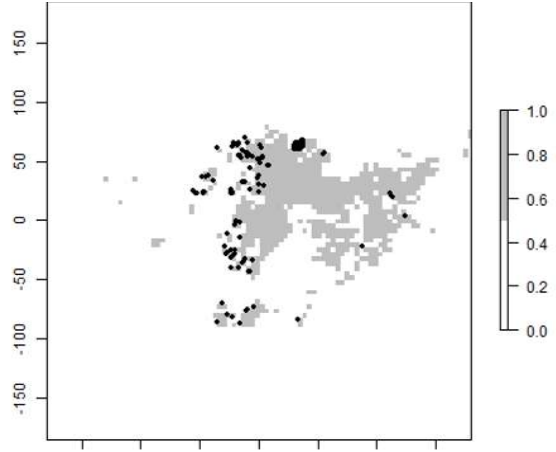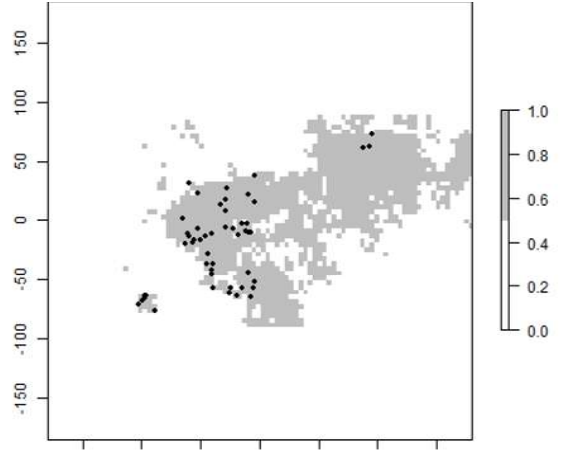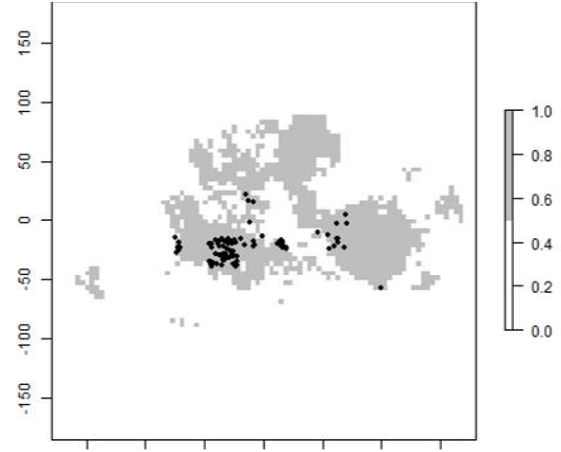

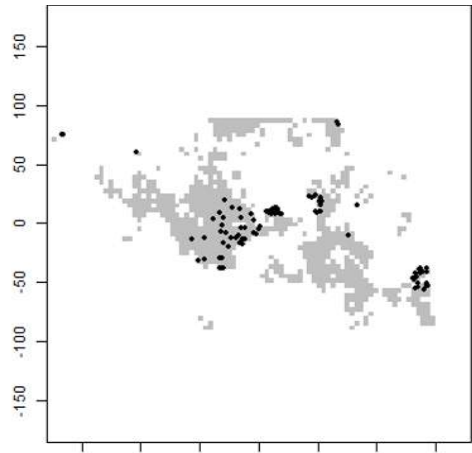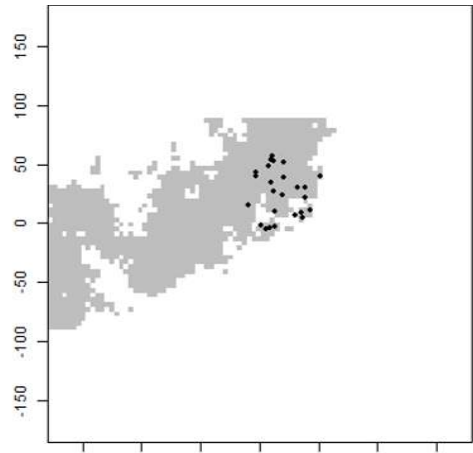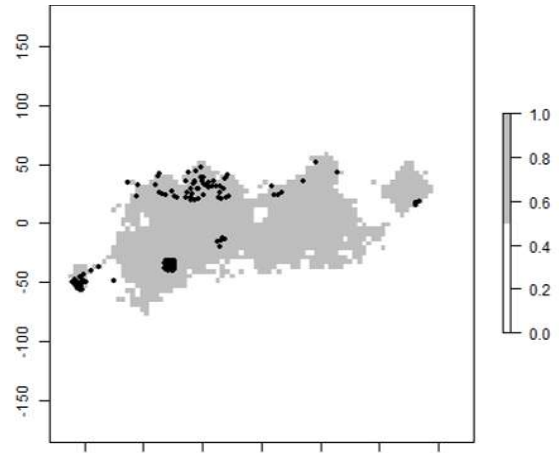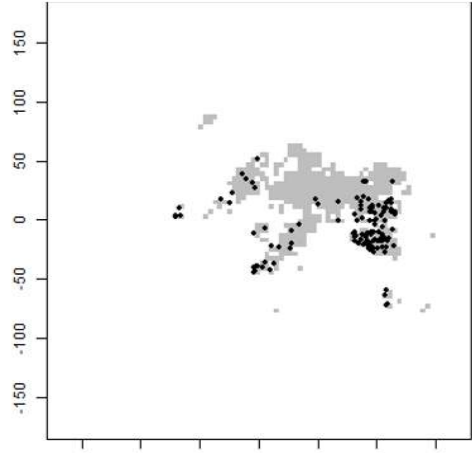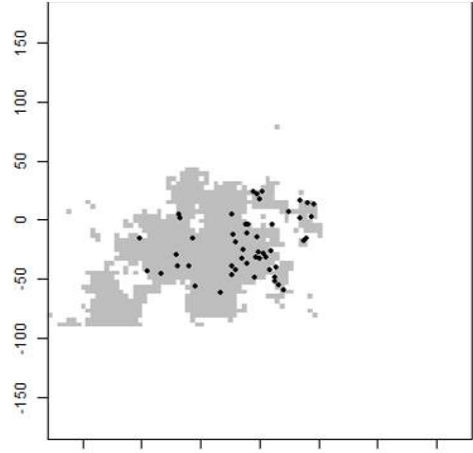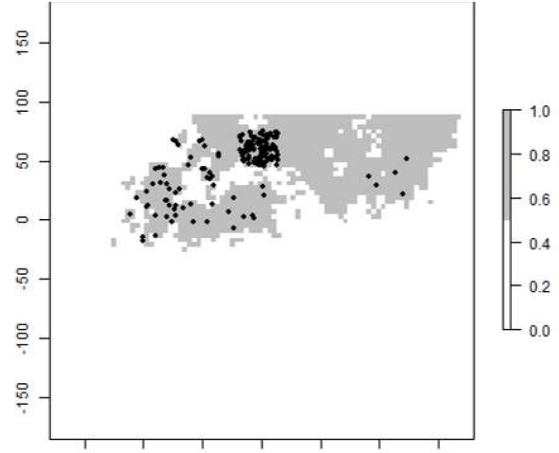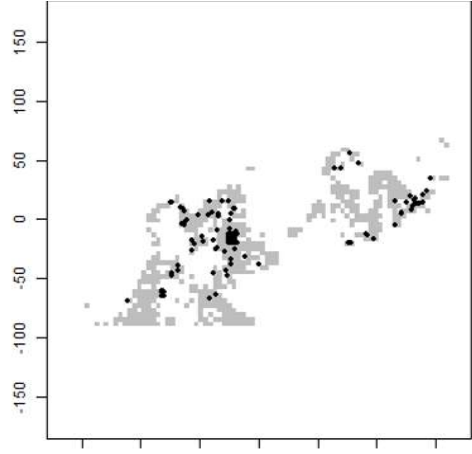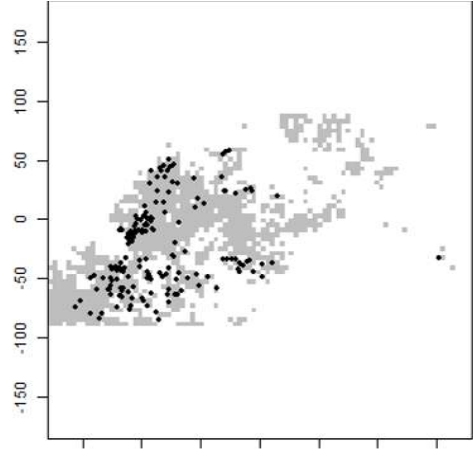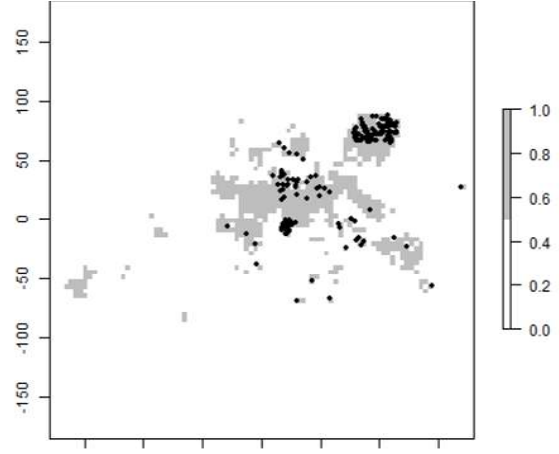

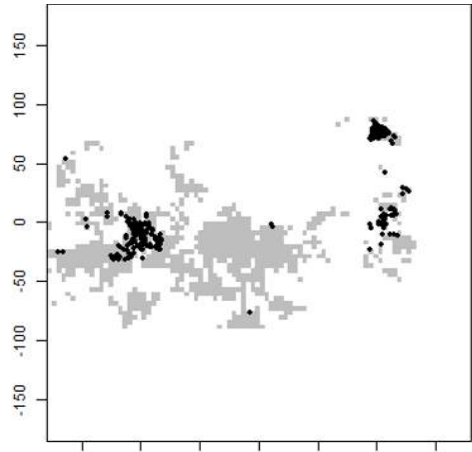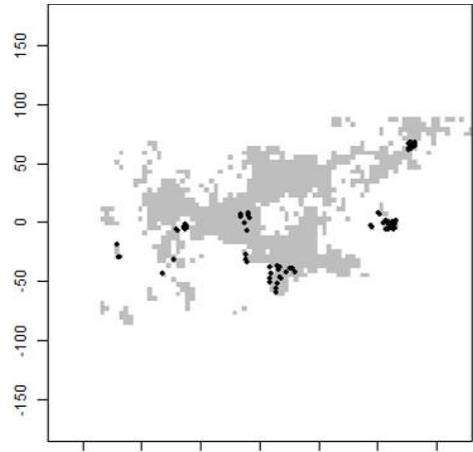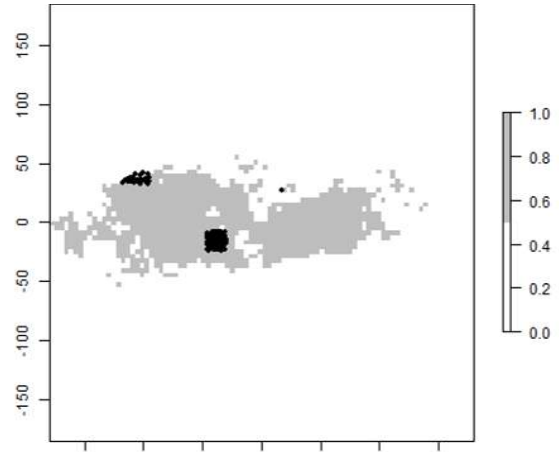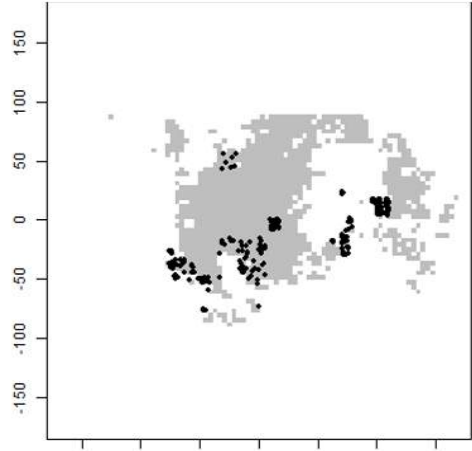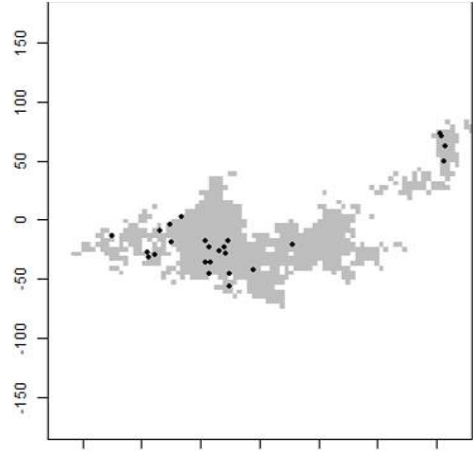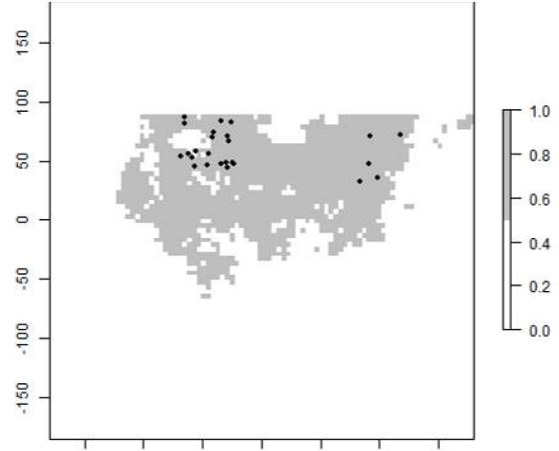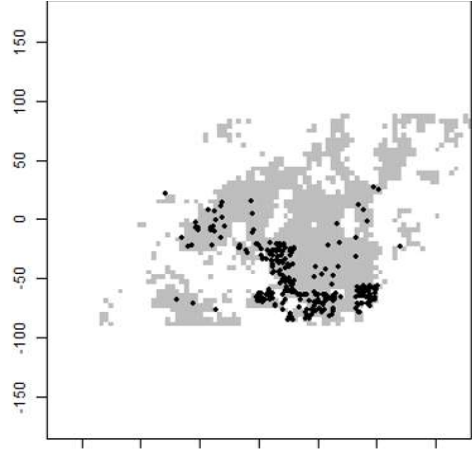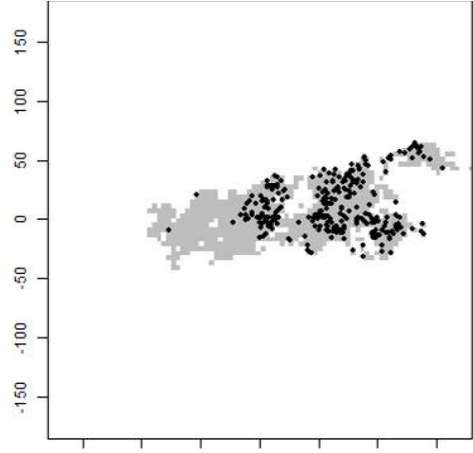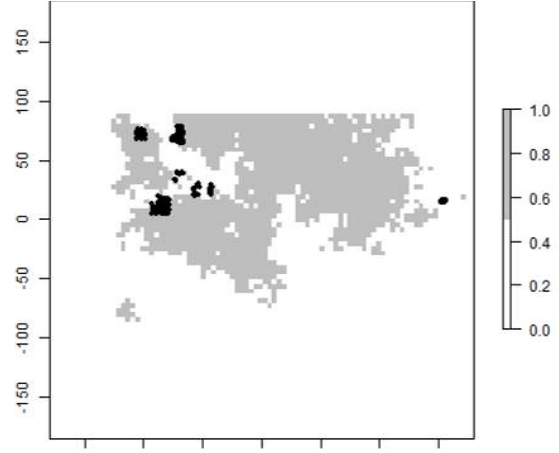

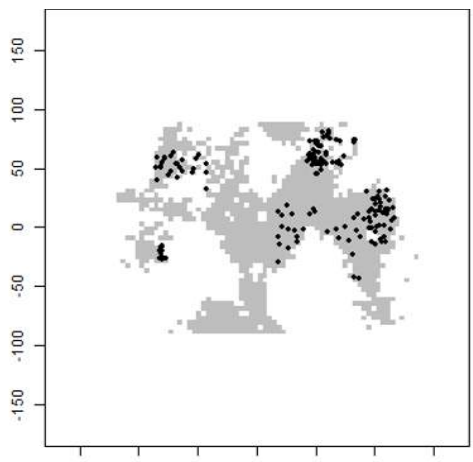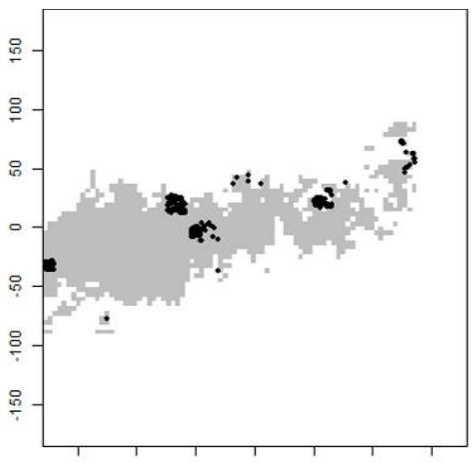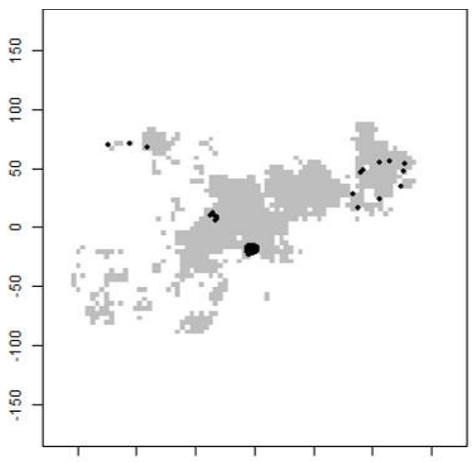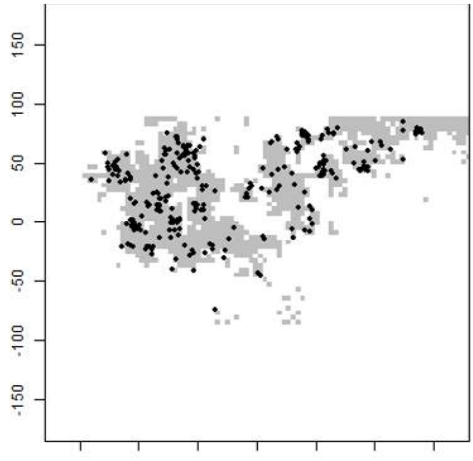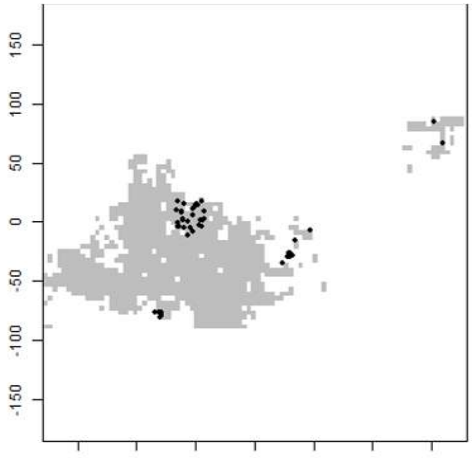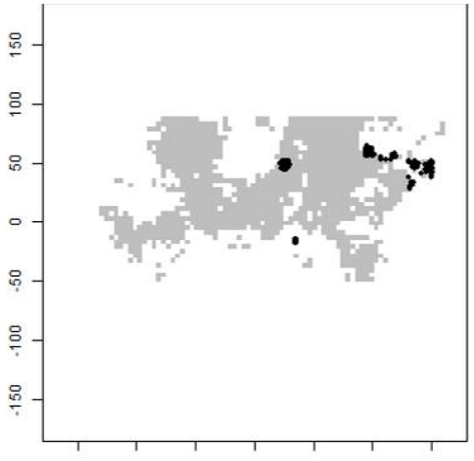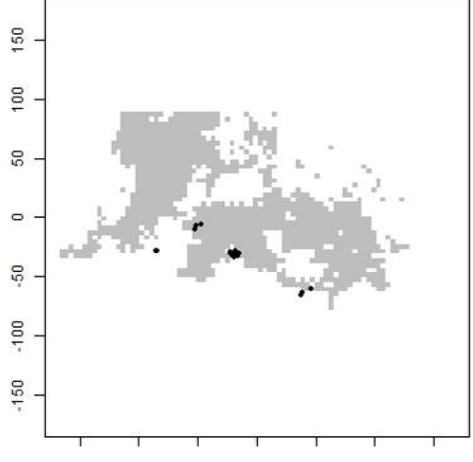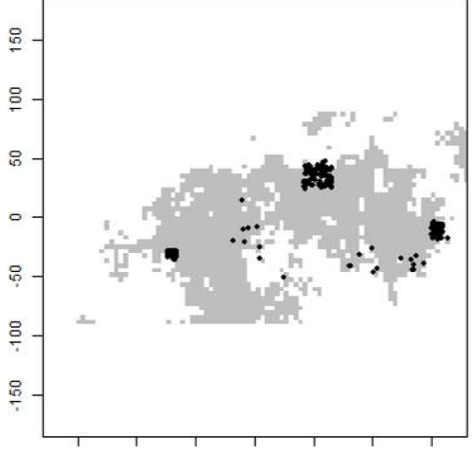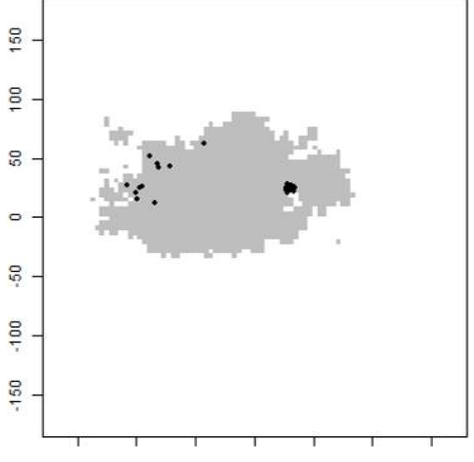

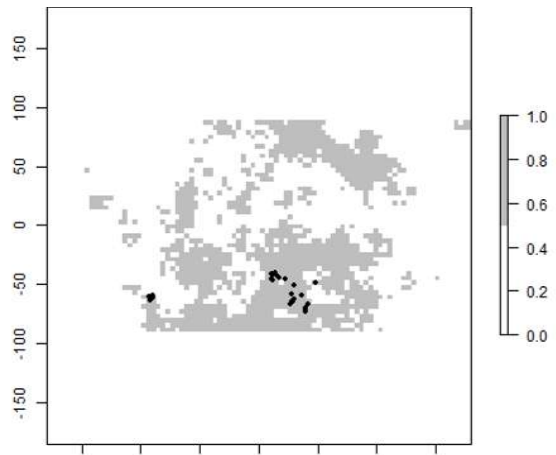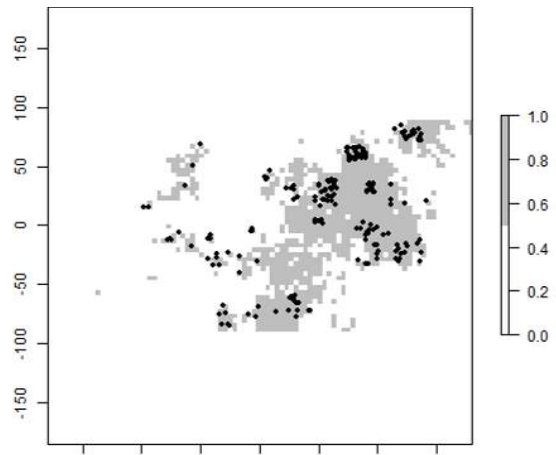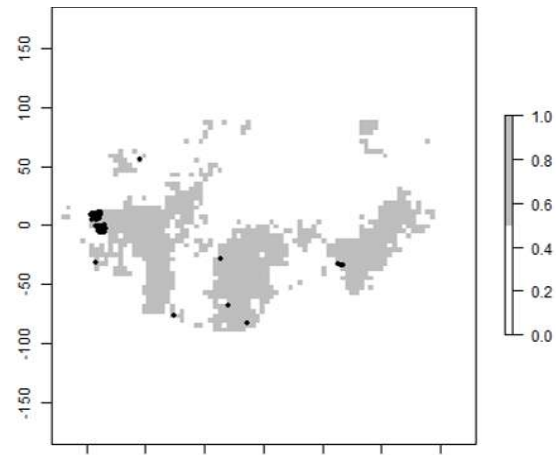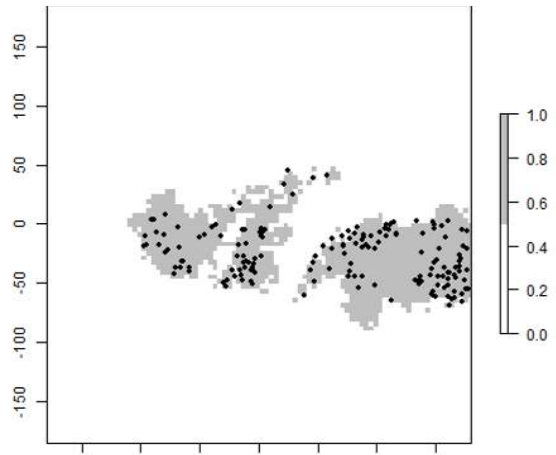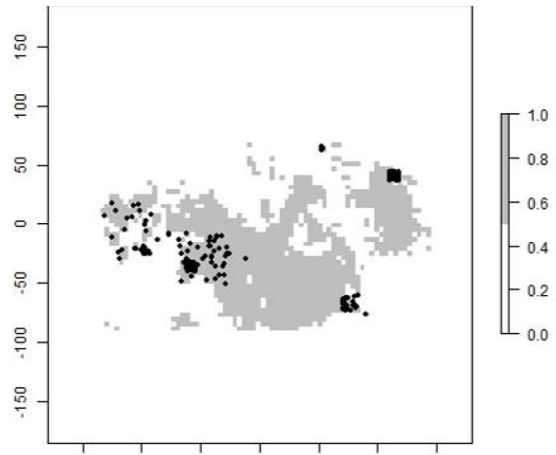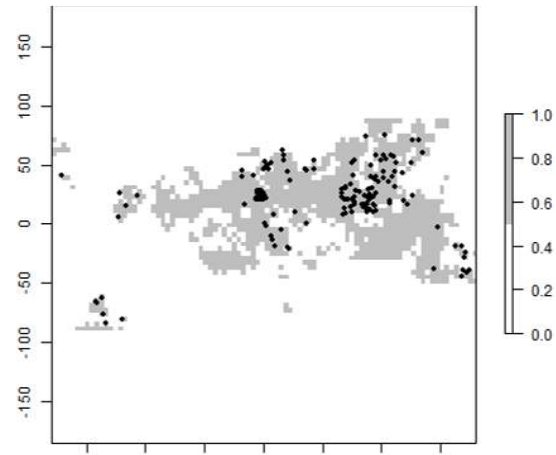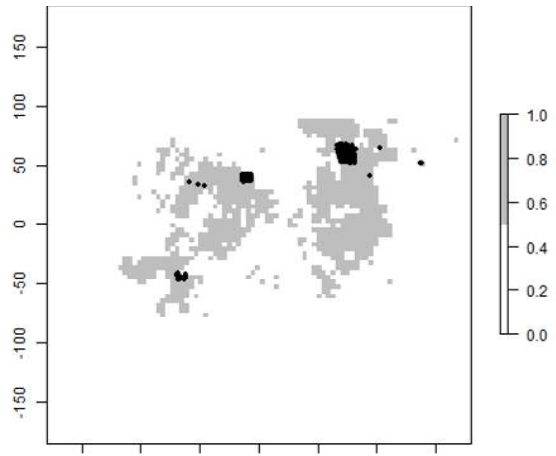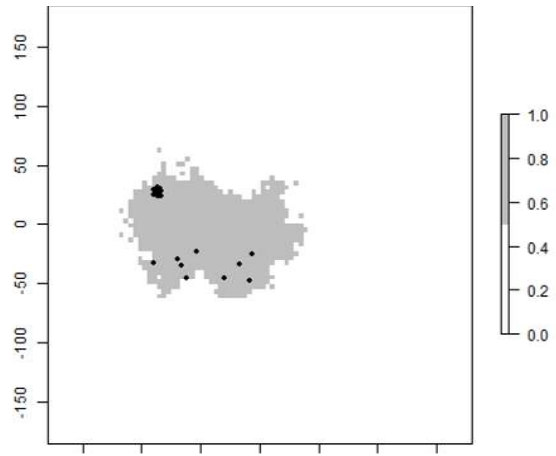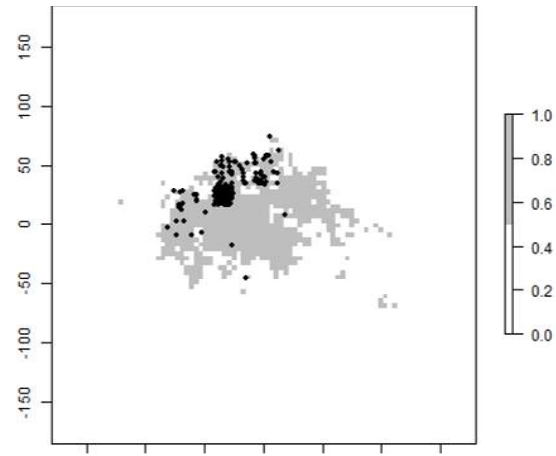

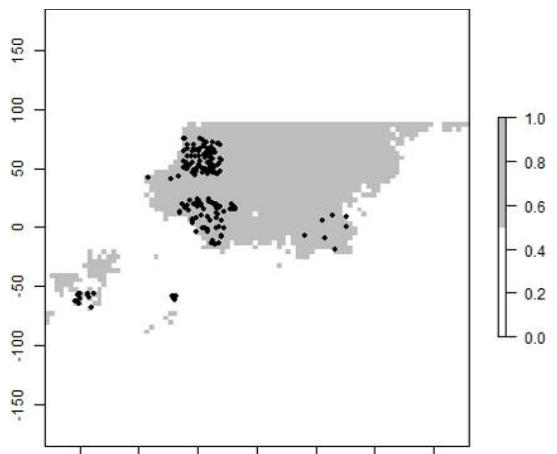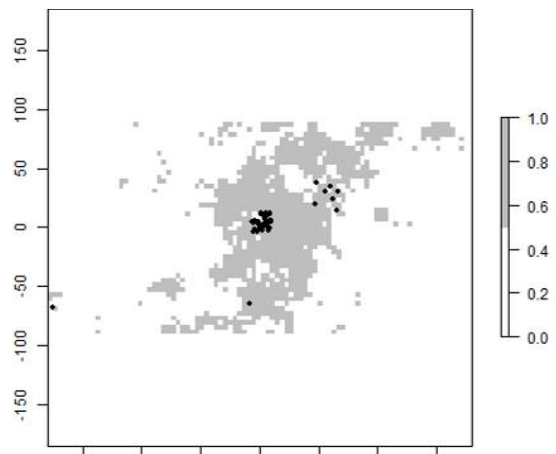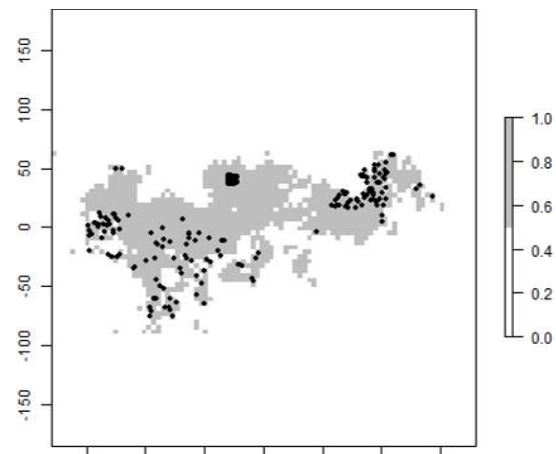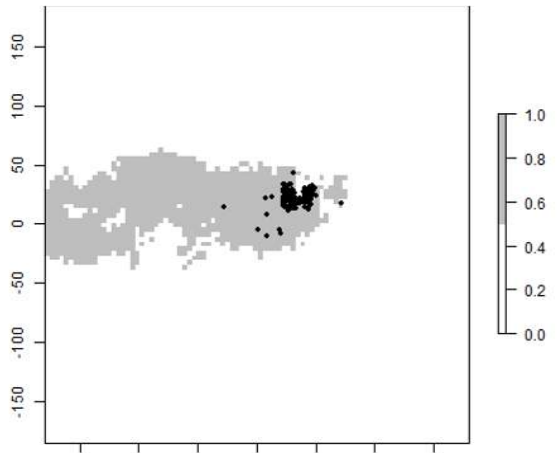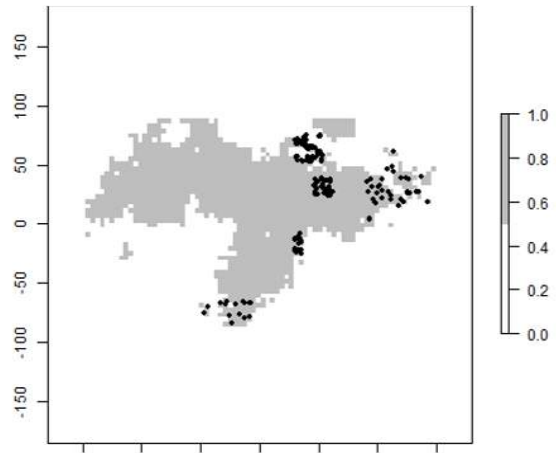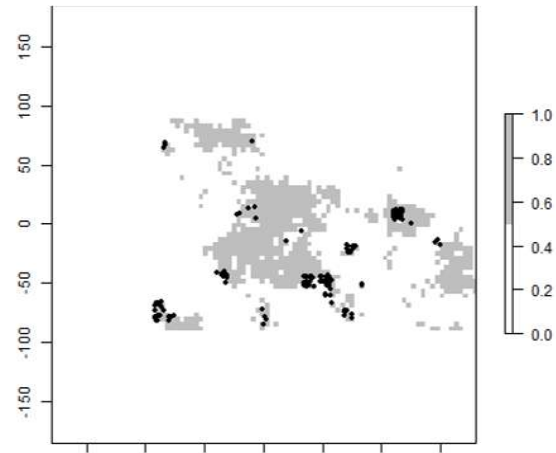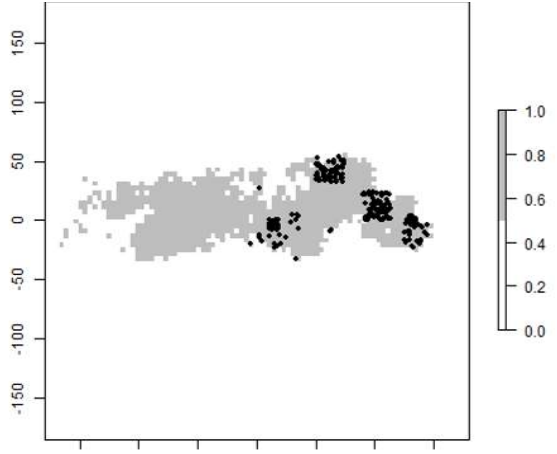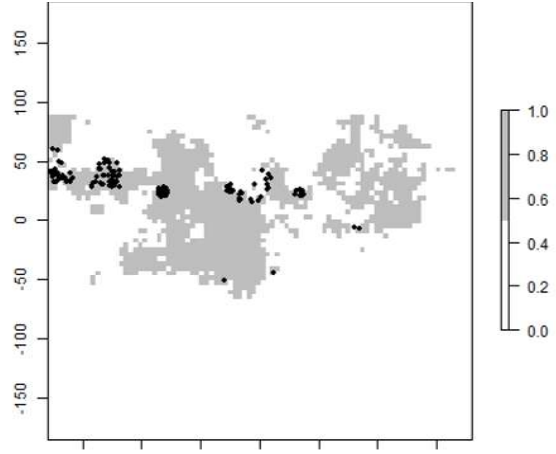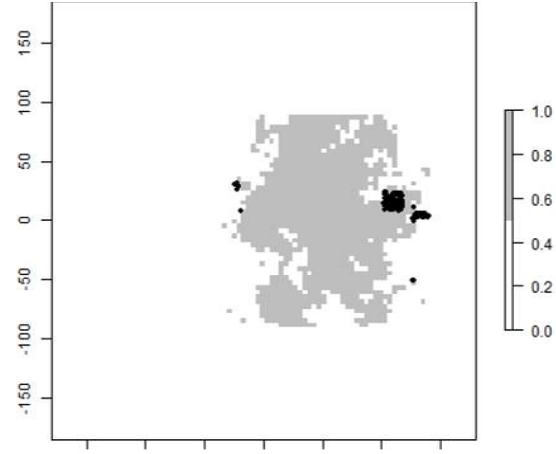

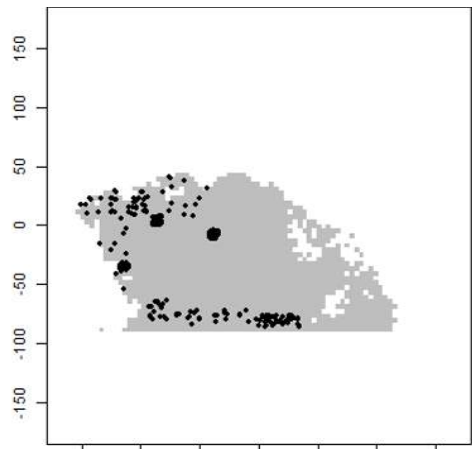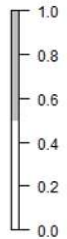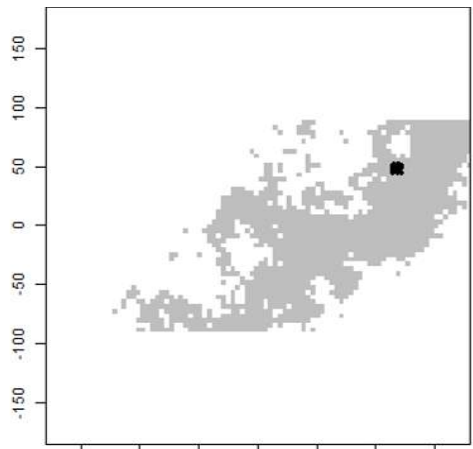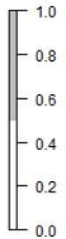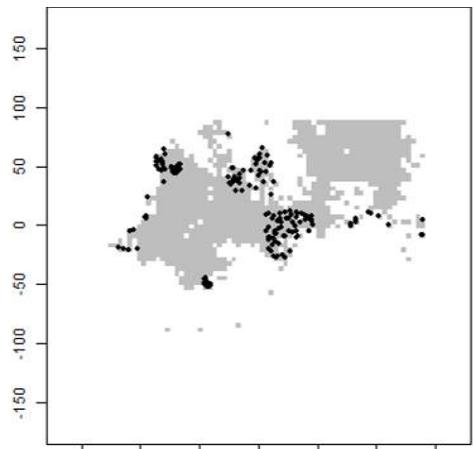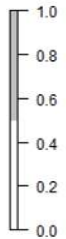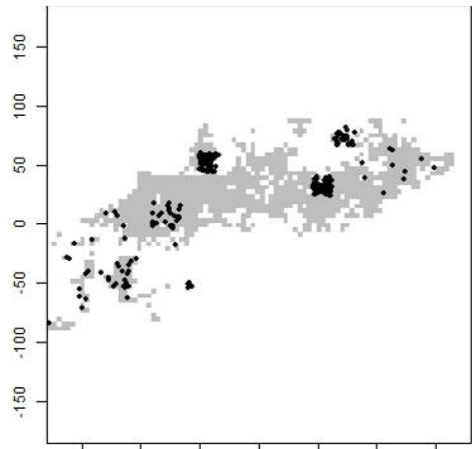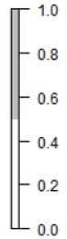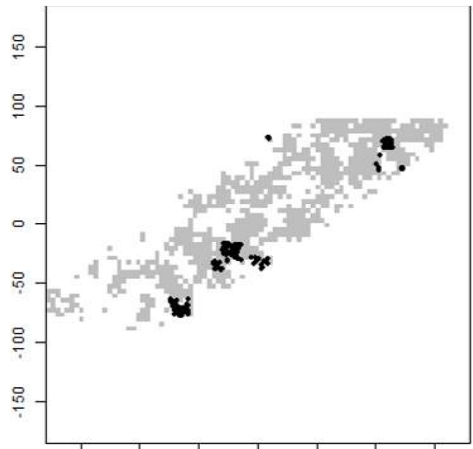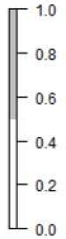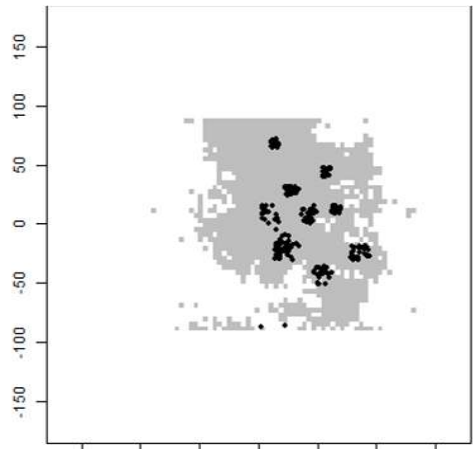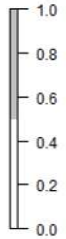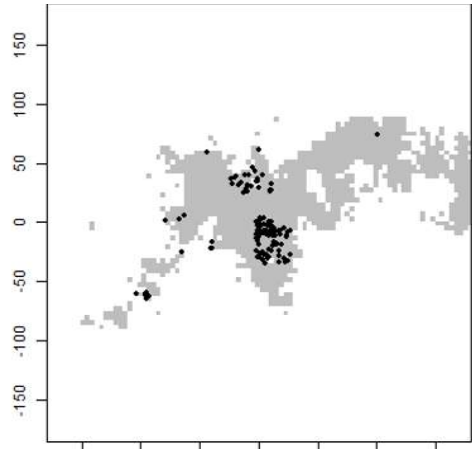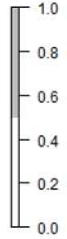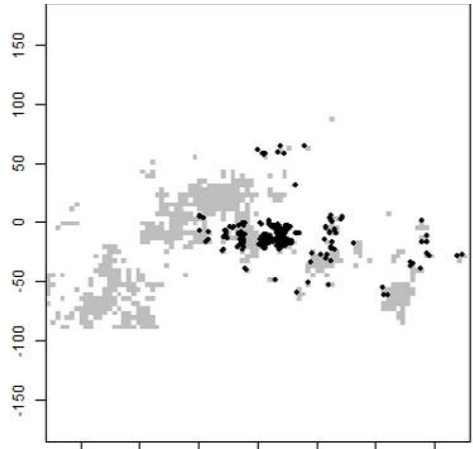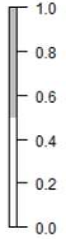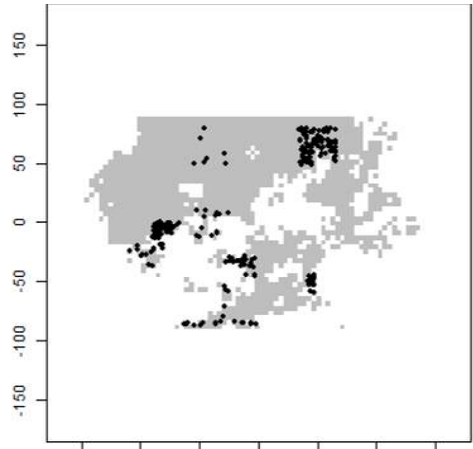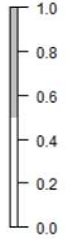



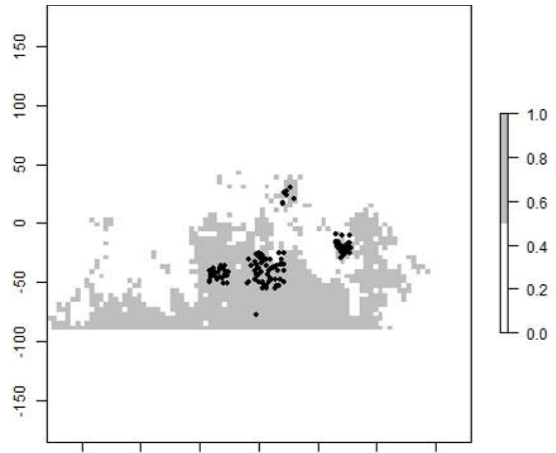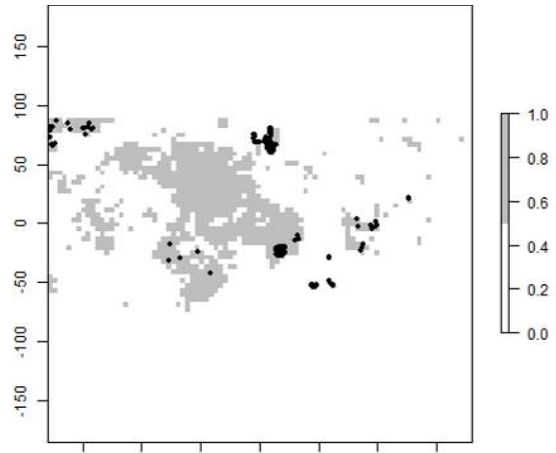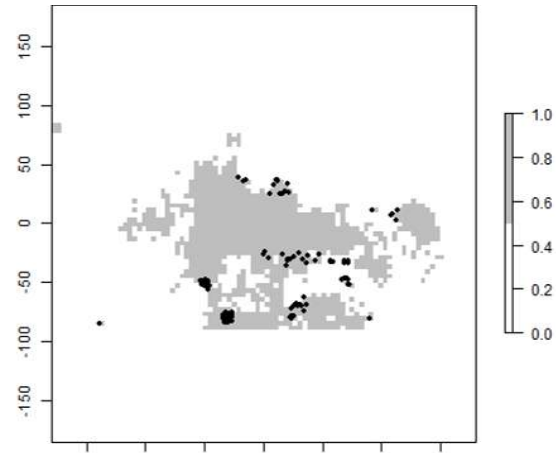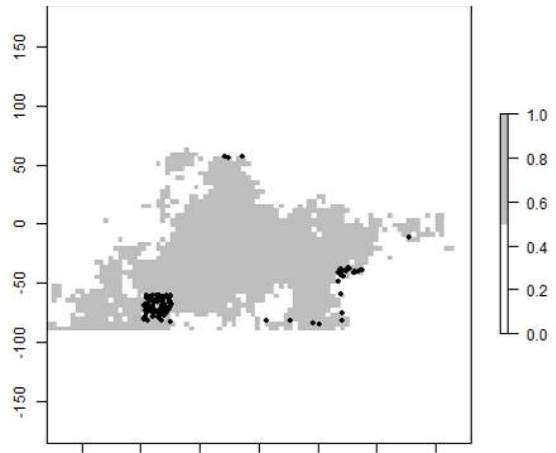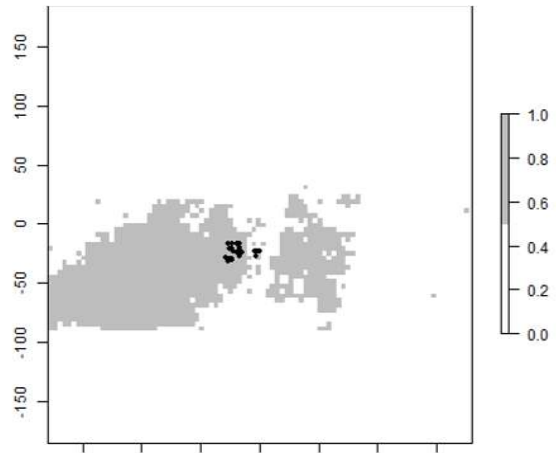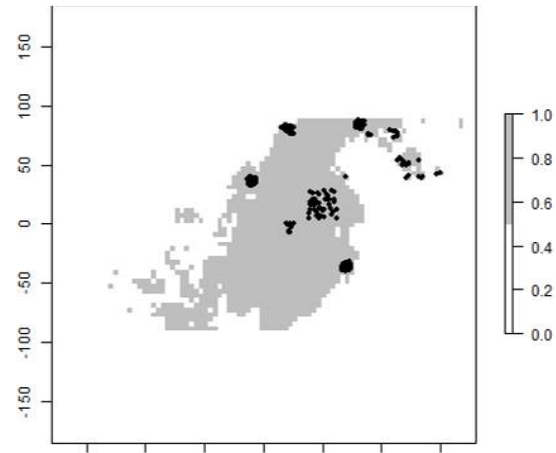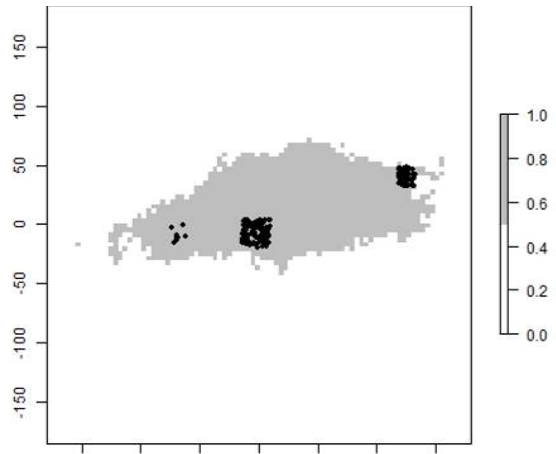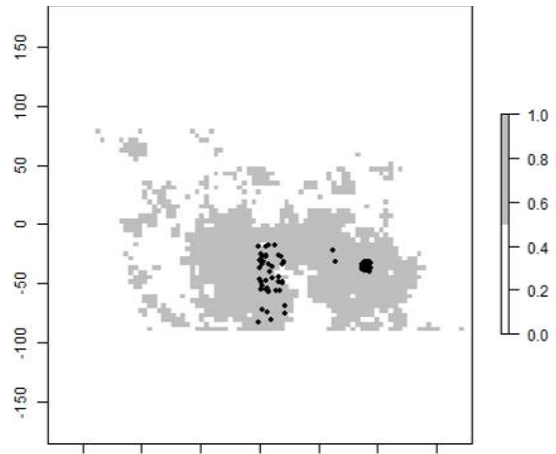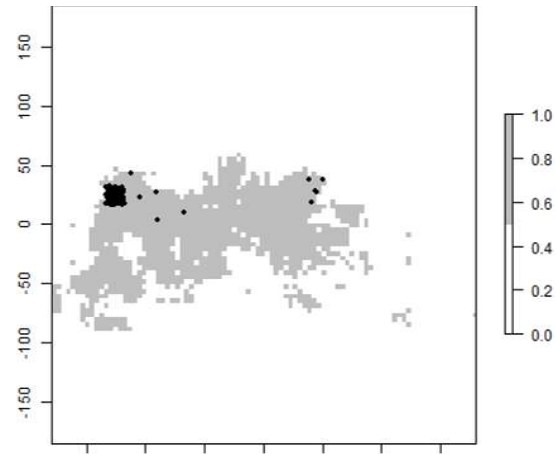

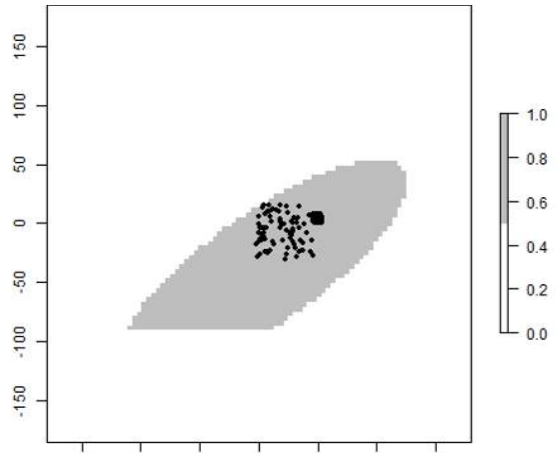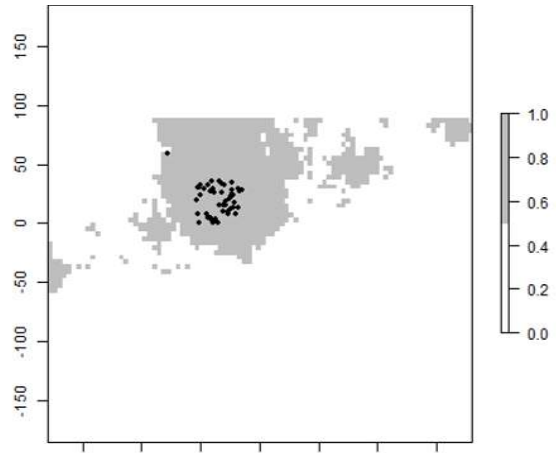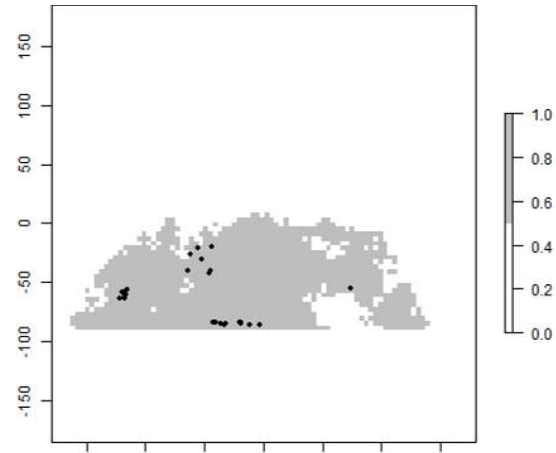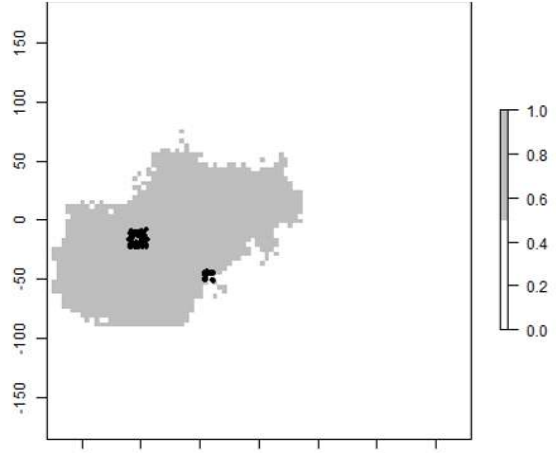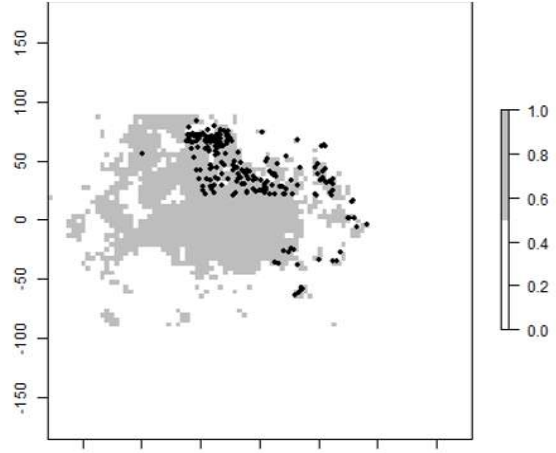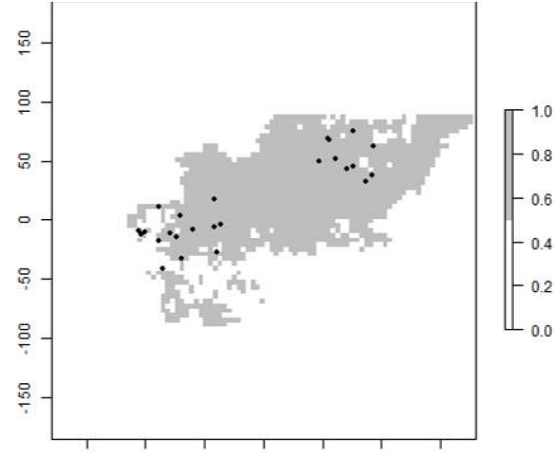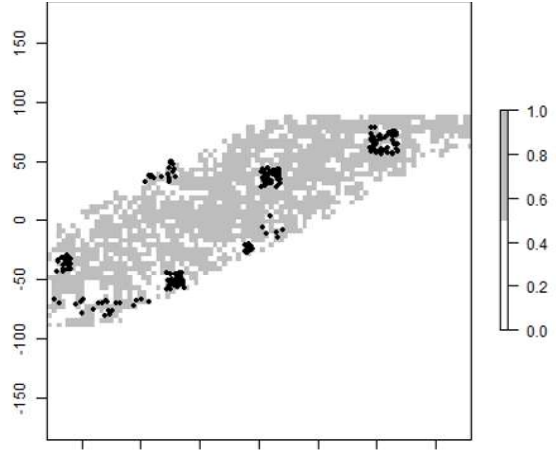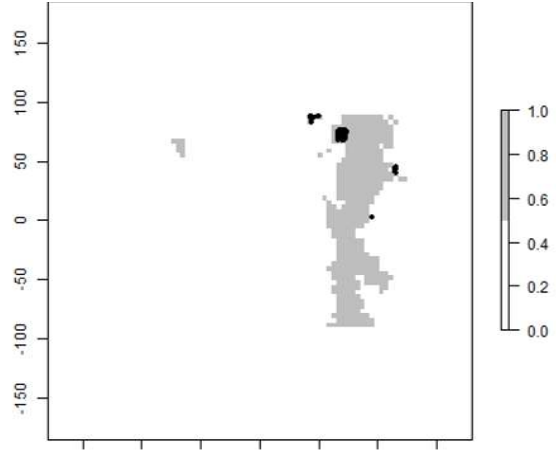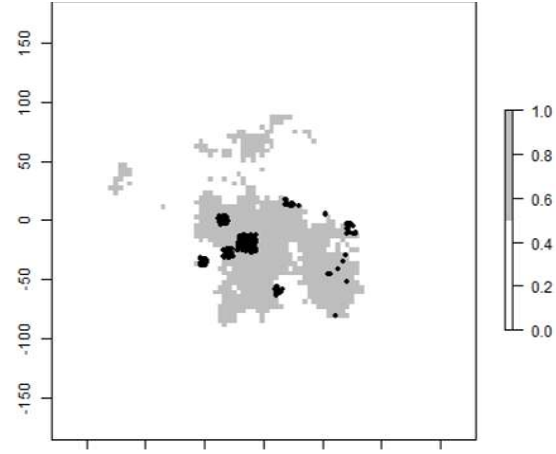

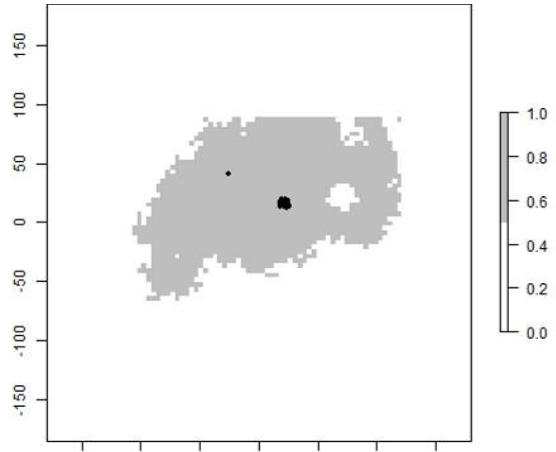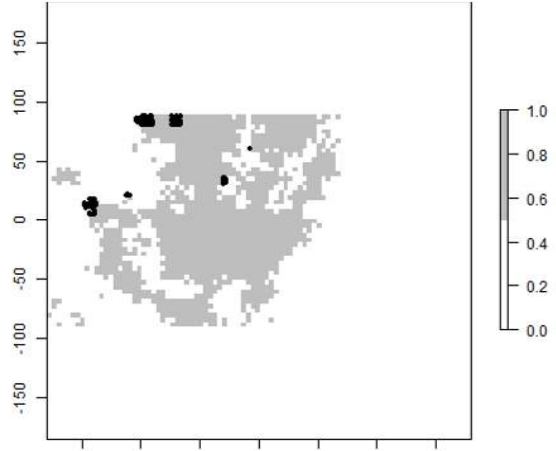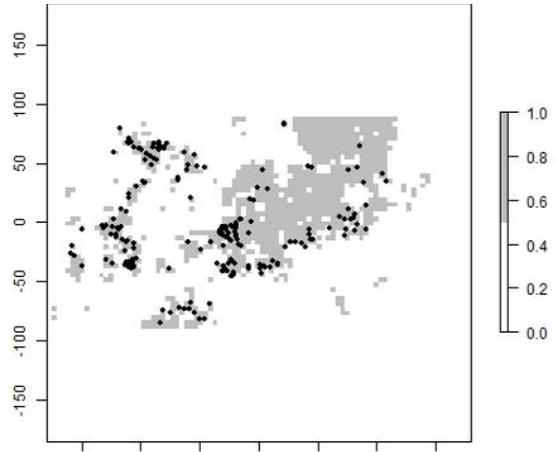

Supplement: Supplementary file [file 105742-3.pdf]
